# Supplementary material
Source: publisher figshare collection journal article supplement (https://frontiersin.figshare.com/ndownloader/files/22198200)
Supplement: Supplementary file 1 [file 22198200]

## Sheet: Embryophyta
Supplementary table 2: Accuracy test results. These two worksheets (Embryophyta and Mammalia) detail the results of the PIA and MEGAN analyses on 250 GenBank sequences of known origin. The original reads are detailed in columns 1-3. The control columns refer to analyses where the initial BLAST search was performed against the full GenBank database (downloaded on 05-09-2019). The exclusion columns…
Rows in bold indicate that the exclusion condition performed better than the control condition for either method.
Read identifier	Original FASTA		Control MEGAN			Control PIA			Exclusion MEGAN			Exclusion PIA
	ID	Name	ID	Name	Status	ID	Name	Status	ID	Name	Status	ID	Name	Status
gi|1001184260|dbj|LC126834.1|	23413	Osyris lanceolata	23413	Osyris lanceolata	Correct (family or below)
gi|1016841295|gb|KU888829.1|	19768	Patellifolia procumbens	19768	Patellifolia procumbens	Correct (family or below)
gi|1024250124|gb|KU201028.1|	3513	Quercus alba	33090	Viridiplantae	Correct (above family)	33090	Viridiplantae	Correct (above family)	33090	Viridiplantae	Correct (above family)	33090	Viridiplantae	Correct (above family)
gi|1041518840|gb|KU303752.1|	4707	Lapageria rosea	1437183	Mesangiospermae	Correct (above family)				1437183	Mesangiospermae	Correct (above family)	1437183	Mesangiospermae	Correct (above family)
gi|1041518967|gb|KU303824.1|	4694	Medeola virginiana	4667	Liliales	Correct (above family)	1437183	Mesangiospermae	Correct (above family)	4667	Liliales	Correct (above family)	1437183	Mesangiospermae	Correct (above family)
gi|109633052|gb|DX918411.1|	3523	Casuarina equisetifolia
gi|1103929822|gb|JZ948649.1|	4047	Coriandrum sativum	241778	Apioideae	Correct (family or below)				241778	Apioideae	Correct (family or below)
gi|11345359|gb|AF299229.1|	3778	Ceratopetalum gummiferum	3776	Cunoniaceae	Correct (family or below)				3776	Cunoniaceae	Correct (family or below)
gi|11457|emb|X12787.1|	3396	Cycas revoluta	58024	Spermatophyta	Correct (above family)	3395	Cycas	Correct (family or below)	58024	Spermatophyta	Correct (above family)	58024	Spermatophyta	Correct (above family)
gi|11469|emb|X00758.1|	3288	Dryopteris acuminata	3268	Polypodiales	Correct (above family)	3268	Polypodiales	Correct (above family)	3268	Polypodiales	Correct (above family)	2014962	Thelypteridoideae	Incorrect
gi|11616|emb|X02714.1|	4472	Lemna minor	1437183	Mesangiospermae	Correct (above family)				1437183	Mesangiospermae	Correct (above family)
gi|11734|emb|X51641.1|	13816	Marsilea quadrifolia	1521262	Polypodiidae	Correct (above family)	13815	Marsilea	Correct (above family)	1521262	Polypodiidae	Correct (above family)	1521262	Polypodiidae	Correct (above family)
gi|118390429|gb|EF012577.1|	25629	Taxus baccata	25629	Taxus baccata	Correct (family or below)
gi|1189933093|gb|KY810486.1|	3528	Phytolacca acinosa	3528	Phytolacca acinosa	Correct (family or below)
gi|119034551|gb|EF121364.1|	4431	Nelumbo lutea	1437183	Mesangiospermae	Correct (above family)	4430	Nelumbo	Correct (family or below)	1437183	Mesangiospermae	Correct (above family)	1437183	Mesangiospermae	Correct (above family)
gi|11932|emb|X51978.1|	3285	Osmunda regalis	3193	Embryophyta	Correct (above family)	3193	Embryophyta	Correct (above family)	3193	Embryophyta	Correct (above family)	3193	Embryophyta	Correct (above family)
gi|119358543|emb|AM408113.1|	28932	Nothofagus x alpina	28932	Nothofagus x alpina	Correct (family or below)
gi|120465948|gb|DW223094.1|	13419	Chimonanthus praecox	1	root					1	root
gi|1243790037|gb|MF677798.1|	3670	Luffa aegyptiaca	3670	Luffa aegyptiaca	Correct (family or below)
gi|1247357|emb|A27063.1|	3856	Lathyrus cicera
gi|12489|emb|X64572.1|	4166	Cymbalaria muralis	71240	eudicotyledons	Correct (above family)				71240	eudicotyledons	Correct (above family)
gi|12620|emb|X64571.1|	4168	Lamourouxia sp. UCB	71240	eudicotyledons	Correct (above family)				71240	eudicotyledons	Correct (above family)
gi|12744491|gb|AF318051.1|	4202	Sambucus nigra	1437183	Mesangiospermae	Correct (above family)				35876	Iris x hollandica	Incorrect
gi|12744752|gb|AF319637.1|	4031	Pelargonium x hortorum	4031	Pelargonium x hortorum	Correct (family or below)				57694	Pelargonium peltatum	Incorrect
gi|1284940190|gb|KY529690.1|	4426	Cabomba caroliniana	4426	Cabomba caroliniana	Correct (family or below)				35974	Santalum album	Incorrect
gi|1284945351|gb|KY532772.1|	14027	Trachycarpus fortunei	14027	Trachycarpus fortunei	Correct (family or below)
gi|1284958548|gb|KY540520.1|	16752	Houttuynia cordata	16752	Houttuynia cordata	Correct (family or below)				3827	Cicer arietinum	Incorrect
gi|13717|emb|X52998.1|	4565	Triticum aestivum	147389	Triticeae	Correct (family or below)				147389	Triticeae	Correct (family or below)
gi|14192763|gb|AY033450.1|	15945	Zea luxurians	4575	Zea	Correct (family or below)				4576	Zea diploperennis	Incorrect
gi|14192777|gb|AY033464.1|	4576	Zea diploperennis	4575	Zea	Correct (family or below)				4576	Zea diploperennis	Correct (family or below)
gi|14266|emb|X64570.1|	4172	Agalinis auriculata	71240	eudicotyledons	Correct (above family)				71240	eudicotyledons	Correct (above family)
gi|14283|emb|X64569.1|	4174	Veronica pilosa	71240	eudicotyledons	Correct (above family)				71240	eudicotyledons	Correct (above family)
gi|1431907836|gb|MH158507.1|	28978	Glyptostrobus pensilis	28978	Glyptostrobus pensilis	Correct (family or below)
gi|145230566|gb|EF178799.1|	24953	Myriophyllum sibiricum	24945	Haloragaceae	Correct (family or below)	24952	Myriophyllum	Correct (family or below)	24945	Haloragaceae	Correct (family or below)	24952	Myriophyllum	Correct (family or below)
gi|145230646|gb|EF178879.1|	23262	Penthorum sedoides	23262	Penthorum sedoides	Correct (family or below)				49684	Penthorum chinense	Incorrect
gi|145320820|gb|EF088027.1|	13048	Echinodorus cordifolius	13047	Echinodorus	Correct (family or below)				13047	Echinodorus	Correct (family or below)
gi|14669038|gb|BI203066.1|	3755	Prunus dulcis	3754	Prunus	Correct (family or below)				3760	Prunus persica	Incorrect
gi|1482013098|gb|MG808034.1|	3884	Phaseolus lunatus	3884	Phaseolus lunatus	Correct (family or below)
gi|148503468|gb|ER870425.1|	4283	Cornus florida
gi|1519498631|emb|LS999841.1|	4217	Arctium lappa	4210	Asteraceae	Correct (family or below)	4210	Asteraceae	Correct (family or below)	4210	Asteraceae	Correct (family or below)	4210	Asteraceae	Correct (family or below)
gi|1519498641|emb|LS999846.1|	13055	Chamaenerion angustifolium	3398	Magnoliopsida	Correct (above family)	3398	Magnoliopsida	Correct (above family)	3398	Magnoliopsida	Correct (above family)	3398	Magnoliopsida	Correct (above family)
gi|152206745|gb|EF990106.1|	3996	Jatropha multifida	3996	Jatropha multifida	Correct (family or below)
gi|15529685|gb|AF407554.1|	3359	Tsuga heterophylla	3359	Tsuga heterophylla	Correct (family or below)
gi|1558445640|gb|MK400379.1|	13469	Cupressus sempervirens	2759	Eukaryota	Correct (above family)	2759	Eukaryota	Correct (above family)	2759	Eukaryota	Correct (above family)	2759	Eukaryota	Correct (above family)
gi|156567887|gb|EF608003.1|	3271	Dicksonia antarctica	3271	Dicksonia antarctica	Correct (family or below)
gi|156598758|gb|EU017223.1|	28494	Trachelium caeruleum	71240	eudicotyledons	Correct (above family)	4381	Campanulaceae	Correct (family or below)	71240	eudicotyledons	Correct (above family)	4381	Campanulaceae	Correct (family or below)
gi|1569050407|gb|MK294403.1|	3565	Amaranthus hybridus	3564	Amaranthus	Correct (family or below)	3563	Amaranthaceae	Correct (family or below)	3564	Amaranthus	Correct (family or below)	3563	Amaranthaceae	Correct (family or below)
gi|157043283|gb|EX149658.1|	4082	Solanum peruvianum
gi|1590489012|gb|MG986480.1|	3604	Vitis sp.
gi|15919094|emb|AJ413955.1|	4588	Thinopyrum elongatum	4588	Thinopyrum elongatum	Correct (family or below)	147389	Triticeae	Correct (family or below)	147389	Triticeae	Correct (family or below)
gi|1607780785|gb|MK661441.1|	28967	Pelargonium capitatum	4030	Pelargonium	Correct (family or below)				4030	Pelargonium	Correct (family or below)
gi|1607780833|gb|MK661465.1|	4029	Pelargonium grandiflorum	4030	Pelargonium	Correct (family or below)				4030	Pelargonium	Correct (family or below)
gi|1607780981|gb|MK661539.1|	4032	Pelargonium zonale	4030	Pelargonium	Correct (family or below)				4030	Pelargonium	Correct (family or below)
gi|16092|emb|X01620.1|	3234	Anthoceros punctatus	3233	Anthoceros	Correct (family or below)	3233	Anthoceros	Correct (family or below)	41834	Anthoceros agrestis	Incorrect	3193	Embryophyta	Correct (above family)
gi|161089528|gb|EY458086.1|	3758	Prunus domestica	3754	Prunus	Correct (family or below)				3754	Prunus	Correct (family or below)
gi|1621573558|gb|MH894103.1|	4552	Secale sylvestre	4447	Liliopsida	Correct (above family)	4479	Poaceae	Correct (family or below)	3398	Magnoliopsida	Correct (above family)	4479	Poaceae	Correct (family or below)
gi|164513817|emb|AM890044.1|	4465	Acorus calamus	1437183	Mesangiospermae	Correct (above family)	1437183	Mesangiospermae	Correct (above family)	1437183	Mesangiospermae	Correct (above family)	1437183	Mesangiospermae	Correct (above family)
gi|164513847|emb|AM890059.1|	13626	Paeonia tenuifolia	1437201	Pentapetalae	Correct (above family)	1437201	Pentapetalae	Correct (above family)	1437201	Pentapetalae	Correct (above family)	1437201	Pentapetalae	Correct (above family)
gi|168659|gb|M61189.1|	4577	Zea mays	4577	Zea mays	Correct (family or below)
gi|168805760|gb|EU306571.1|	3327	Larix occidentalis	3327	Larix occidentalis	Correct (family or below)
gi|169234|gb|M31358.1|	4104	Petunia sp.	1	root					4102	Petunia × hybrida	Incorrect
gi|17221034|gb|AY034313.1|	4470	Lemna gibba	4470	Lemna gibba	Correct (family or below)	4469	Lemna	Correct (family or below)	161098	Lemna disperma	Incorrect	4469	Lemna	Correct (family or below)
gi|173707|gb|M35406.1|	4683	Allium tuberosum	58024	Spermatophyta	Correct (above family)	58024	Spermatophyta	Correct (above family)	58024	Spermatophyta	Correct (above family)
gi|173755|gb|M37170.1|	4591	Arundinaria gigantea	1437197	Petrosaviidae	Correct (above family)	359160	BOP clade	Correct (family or below)	2759	Eukaryota	Correct (above family)	1437183	Mesangiospermae	Correct (above family)
gi|173898|gb|M22136.1|	4513	Hordeum vulgare	1437183	Mesangiospermae	Correct (above family)	147389	Triticeae	Correct (family or below)	1437183	Mesangiospermae	Correct (above family)	1437183	Mesangiospermae	Correct (above family)
gi|17402635|gb|AF227468.1|	3397	Cycas circinalis	3397	Cycas circinalis	Correct (family or below)	3297	Cycadales	Correct (above family)	1437180	Acrogymnospermae	Correct (above family)
gi|175209|gb|M10435.1|	3252	Lycopodium clavatum	3252	Lycopodium clavatum	Correct (family or below)	58023	Tracheophyta	Correct (above family)	3193	Embryophyta	Correct (above family)	3193	Embryophyta	Correct (above family)
gi|175256|gb|M10432.1|	3371	Metasequoia glyptostroboides	1446379	Cupressales	Correct (above family)	1446379	Cupressales	Correct (above family)	3367	Cupressaceae	Correct (family or below)	3367	Cupressaceae	Correct (family or below)
gi|175276|gb|M35056.1|	3229	Mnium rugicum	3193	Embryophyta	Correct (above family)	3227	Mniaceae	Correct (family or below)	3193	Embryophyta	Correct (above family)	3208	Bryophyta	Correct (above family)
gi|17692|emb|X66110.1|	4491	Aegilops umbellulata	4491	Aegilops umbellulata	Correct (family or below)				147389	Triticeae	Correct (family or below)
gi|18072960|emb|AJ345100.1|	12990	Carpinus betulus	3514	Betulaceae	Correct (family or below)	3514	Betulaceae	Correct (family or below)	3514	Betulaceae	Correct (family or below)	3514	Betulaceae	Correct (family or below)
gi|18074057|emb|AJ345047.1|	4052	Hedera helix	364270	Apiineae	Correct (above family)	4036	Apiales	Correct (above family)	4036	Apiales	Correct (above family)	4036	Apiales	Correct (above family)
gi|18389|emb|X00377.1|	3258	Equisetum arvense	241806	Polypodiopsida	Correct (above family)	241806	Polypodiopsida	Correct (above family)	1521262	Polypodiidae	Correct (above family)	1521262	Polypodiidae	Incorrect
gi|18445|emb|X06996.1|	3388	Ephedra kokanica	1437180	Acrogymnospermae	Correct (above family)	1437180	Acrogymnospermae	Correct (above family)	1437180	Acrogymnospermae	Correct (above family)	1437180	Acrogymnospermae	Correct (above family)
gi|18628628|dbj|BD001888.1|	3561	Spinacia
gi|187814367|gb|FD382500.1|	20340	Ceratonia siliqua
gi|1899068|gb|U84217.1|	4089	Nicotiana debneyi	4085	Nicotiana	Correct (family or below)				4097	Nicotiana tabacum	Incorrect
gi|190607082|gb|FG943047.1|	4214	Ambrosia trifida	4232	Helianthus annuus	Incorrect				4232	Helianthus annuus	Incorrect
gi|19443|emb|X01618.1|	3207	Lophocolea heterophylla	2759	Eukaryota	Correct (above family)	3193	Embryophyta	Correct (above family)	2759	Eukaryota	Correct (above family)	2759	Eukaryota	Correct (above family)
gi|19456|emb|X54460.1|	3326	Larix laricina	3326	Larix laricina	Correct (family or below)				3328	Picea	Incorrect
gi|19477|emb|X04987.1|	3873	Lupinus luteus	1437183	Mesangiospermae	Correct (above family)				1437183	Mesangiospermae	Correct (above family)	1437183	Mesangiospermae	Correct (above family)
gi|197131701|gb|EU922147.1|	28960	Erodium texanum	28960	Erodium texanum	Correct (family or below)	21555	Erodium	Correct (family or below)	4027	Geraniaceae	Correct (family or below)	21555	Erodium	Correct (family or below)
gi|197131705|gb|EU922290.1|	28963	Geranium macrorrhizum	4027	Geraniaceae	Correct (family or below)	4028	Geranium	Correct (family or below)	4027	Geraniaceae	Correct (family or below)	4027	Geraniaceae	Correct (family or below)
gi|197131711|gb|EU922506.1|	28970	Monsonia vanderietiae	21556	Monsonia	Correct (family or below)	21556	Monsonia	Correct (family or below)	21556	Monsonia	Correct (family or below)	21556	Monsonia	Correct (family or below)
gi|197131713|gb|EU922578.1|	28968	Pelargonium cotyledonis	4030	Pelargonium	Correct (family or below)	4030	Pelargonium	Correct (family or below)	4030	Pelargonium	Correct (family or below)	4030	Pelargonium	Correct (family or below)
gi|20963|emb|X01619.1|	3231	Plagiomnium trichomanes	2759	Eukaryota	Correct (above family)	2759	Eukaryota		2759	Eukaryota	Correct (above family)	2759	Eukaryota	Correct (above family)
gi|210148030|gb|EU821711.1|	28501	Cornus kousa	28501	Cornus kousa	Correct (family or below)
gi|21388|emb|V01363.1|	4702	Scilla siberica	4702	Scilla siberica	Correct (family or below)
gi|215399760|gb|FJ481130.1|	13329	Achillea millefolium	13329	Achillea millefolium	Correct (family or below)
gi|220962050|gb|FI569185.1|	28471	Cymbidium hybrid cultivar	14366	Cymbidium	Correct (family or below)				112604	Cymbidium faberi	Incorrect
gi|22220159|gb|BQ843223.1|	4153	Craterostigma plantagineum
gi|22796852|emb|AJ492877.1|	4297	Ilex vomitoria	4297	Ilex vomitoria	Correct (family or below)	4295	Ilex	Correct (family or below)	4295	Ilex	Correct (family or below)
gi|238056173|gb|FJ395294.1|	4123	Convolvulus arvensis	4118	Convolvulaceae	Correct (family or below)	4118	Convolvulaceae	Correct (family or below)	4118	Convolvulaceae	Correct (family or below)	4119	Ipomoea	Incorrect
gi|238056214|gb|FJ395335.1|	28509	Glechoma hederacea	216706	Nepetoideae	Correct (family or below)	216706	Nepetoideae	Correct (family or below)	216706	Nepetoideae	Correct (family or below)	216706	Nepetoideae	Correct (family or below)
gi|238668728|gb|FI767892.1|	4170	Striga asiatica
gi|23873720|gb|AY032786.1|	3685	Passiflora quadrangularis	3685	Passiflora quadrangularis	Correct (family or below)	3684	Passiflora	Correct (family or below)	3684	Passiflora	Correct (family or below)	3684	Passiflora	Correct (family or below)
gi|240252269|gb|GQ247996.1|	3412	Magnolia virginiana	3398	Magnoliopsida	Correct (above family)	3401	Magnoliaceae	Correct (family or below)	3398	Magnoliopsida	Correct (above family)	3402	Magnolia	Correct (family or below)
gi|242801068|gb|FJ395433.1|	3501	Urtica dioica	3501	Urtica dioica	Correct (family or below)	3500	Urtica	Correct (family or below)	3500	Urtica	Correct (family or below)
gi|242817883|gb|FJ395789.1|	15304	Alopecurus pratensis	147368	Pooideae	Correct (family or below)	147368	Pooideae	Correct (family or below)	147368	Pooideae	Correct (family or below)	147368	Pooideae	Correct (family or below)
gi|251088|gb|S39938.1|	4494	Aegilops markgrafii	4494	Aegilops markgrafii	Correct (family or below)				4550	Secale cereale	Incorrect
gi|259414604|gb|GQ853887.1|	3735	Moringa oleifera	3735	Moringa oleifera	Correct (family or below)
gi|260162701|gb|FI856255.1|	4505	Coix lacryma-jobi	4505	Coix lacryma-jobi	Correct (family or below)
gi|261279129|gb|GU001652.1|	16902	Cornus alternifolia	4281	Cornus	Correct (family or below)	4281	Cornus	Correct (family or below)	4281	Cornus	Correct (family or below)
gi|261279130|gb|GU001653.1|	4285	Cornus mas	234389	Cornus eydeana	Incorrect	4281	Cornus	Correct (family or below)	234389	Cornus eydeana	Incorrect
gi|261279138|gb|GU001661.1|	16906	Cornus officinalis	234389	Cornus eydeana	Incorrect	4281	Cornus	Correct (family or below)	234389	Cornus eydeana	Incorrect
gi|261279140|gb|GU001663.1|	4284	Cornus racemosa	4281	Cornus	Correct (family or below)	4281	Cornus	Correct (family or below)	4281	Cornus	Correct (family or below)
gi|2697038|gb|U82648.1|	3407	Magnolia x soulangeana	131567	cellular organisms	Correct (above family)	131567	cellular organisms	Correct (above family)	3400	Magnoliales	Correct (above family)	3400	Magnoliales	Correct (above family)
gi|2697040|gb|U82650.1|	4403	Platanus occidentalis	131567	cellular organisms	Correct (above family)	131567	cellular organisms	Correct (above family)	131567	cellular organisms	Correct (above family)	131567	cellular organisms	Correct (above family)
gi|271280960|dbj|AB492062.1|	13523	Euptelea polyandra	13523	Euptelea polyandra	Correct (family or below)
gi|2735677|gb|AF001864.1|	4738	Joinvillea plicata	4737	Joinvillea	Correct (family or below)				38723	Joinvillea ascendens	Incorrect
gi|27357057|gb|AY165740.1|	4298	Ilex aquifolium	4295	Ilex	Correct (family or below)	4295	Ilex	Correct (family or below)	4295	Ilex	Correct (family or below)	4295	Ilex	Correct (family or below)
gi|27803098|emb|AJ517229.1|	4516	Hordeum bulbosum	4516	Hordeum bulbosum	Correct (family or below)				52712	Hordeum brachyantherum	Incorrect
gi|27803101|emb|AJ517232.1|	15565	Hordeum chilense	4512	Hordeum	Correct (family or below)				52712	Hordeum brachyantherum	Incorrect
gi|27803140|emb|AJ517293.1|	4551	Secale montanum	4551	Secale montanum	Correct (family or below)				147389	Triticeae	Correct (family or below)
gi|27882869|gb|CB074645.1|	3605	Vitis aestivalis	29760	Vitis vinifera	Incorrect				91888	lamiids	Incorrect
gi|28422846|gb|CB252003.1|	4563	Tripsacum dactyloides
gi|28949159|emb|AJ438797.1|	4026	Acer pseudoplatanus	4026	Acer pseudoplatanus	Correct (family or below)
gi|290487529|gb|GQ997107.1|	16901	Aucuba japonica	1437201	Pentapetalae	Correct (above family)	4286	Garryaceae	Correct (family or below)	1437201	Pentapetalae	Correct (above family)	71274	asterids	Correct (above family)
gi|290487531|gb|GQ997190.1|	4378	Dillenia indica	1437201	Pentapetalae	Correct (above family)	1437201	Pentapetalae	Correct (above family)	71240	eudicotyledons	Correct (above family)	1437183	Mesangiospermae	Correct (above family)
gi|290487545|gb|GQ997758.1|	3970	Phoradendron leucarpum	3970	Phoradendron leucarpum	Correct (family or below)
gi|290487561|gb|GQ998342.1|	24957	Gunnera manicata	71240	eudicotyledons	Correct (above family)				71240	eudicotyledons	Correct (above family)
gi|290487565|gb|GQ998488.1|	4400	Liquidambar styraciflua	1437183	Mesangiospermae	Correct (above family)	1437183	Mesangiospermae	Correct (above family)	1437183	Mesangiospermae	Correct (above family)	1437183	Mesangiospermae	Correct (above family)
gi|290487575|gb|GQ998849.1|	4407	Trochodendron aralioides	71240	eudicotyledons	Incorrect	1437183	Mesangiospermae	Correct (above family)	71240	eudicotyledons	Incorrect	1437183	Mesangiospermae	Correct (above family)
gi|291481047|gb|GU354196.1|	13731	Tragopogon porrifolius	13730	Tragopogon	Correct (family or below)				45322	Tragopogon dubius	Incorrect
gi|293626621|gb|GW796798.1|	20676	Hymenaea courbaril	131567	cellular organisms	Correct (above family)				131567	cellular organisms	Correct (above family)
gi|295646444|gb|EU486554.2|	4084	Solanum pimpinellifolium	424551	Solanoideae	Correct (family or below)	424551	Solanoideae	Correct (family or below)	424551	Solanoideae	Correct (family or below)
gi|295823625|gb|HM026719.1|	3449	Caltha palustris	3449	Caltha palustris	Correct (family or below)	1463138	Ranunculoideae	Correct (family or below)	1463138	Ranunculoideae	Correct (family or below)
gi|298161271|gb|GU109370.1|	3986	Mercurialis annua	3986	Mercurialis annua	Correct (family or below)
gi|298566594|gb|GU222817.1|	15371	Bromus inermis	1437183	Mesangiospermae	Correct (above family)	1437183	Mesangiospermae	Correct (above family)	1437183	Mesangiospermae	Correct (above family)	1437183	Mesangiospermae	Correct (above family)
gi|298566610|gb|GU222825.1|	13649	Puccinellia distans	147368	Pooideae	Correct (family or below)	1652081	Poeae Chloroplast Group 2 (Poeae type)	Correct (family or below)	147368	Pooideae	Correct (family or below)	1652081	Poeae Chloroplast Group 2 (Poeae type)	Correct (family or below)
gi|300954016|gb|HM002585.1|	13547	Gerbera jamesonii	13547	Gerbera jamesonii	Correct (family or below)
gi|305379333|gb|HM155728.1|	4083	Solanum chilense	4107	Solanum	Correct (family or below)	49274	Lycopersicon	Correct (family or below)	4107	Solanum	Correct (family or below)	49274	Lycopersicon	Correct (family or below)
gi|306486069|gb|HM100334.1|	16924	Davidia involucrata	1437183	Mesangiospermae	Correct (above family)				1437183	Mesangiospermae	Correct (above family)
gi|308292520|gb|HQ357979.1|	3345	Pinus monticola	139272	Strobus	Correct (family or below)	139272	Strobus	Correct (family or below)	139272	Strobus	Correct (family or below)	139272	Strobus	Correct (family or below)
gi|308308139|gb|HQ373598.1|	3344	Pinus longaeva	3344	Pinus longaeva	Correct (family or below)	139272	Strobus	Correct (family or below)	139272	Strobus	Correct (family or below)
gi|311916|emb|X64917.1|	3572	Saponaria officinalis	3572	Saponaria officinalis	Correct (family or below)				3572	Saponaria officinalis	Correct (family or below)
gi|313674108|gb|HQ148118.1|	19769	Beta trigyna	3554	Beta	Correct (family or below)				3555	Beta vulgaris subsp. Vulgaris	Incorrect
gi|318088060|gb|HM173072.1|	4545	Poa pratensis	147368	Pooideae	Correct (family or below)	1652081	Poeae Chloroplast Group 2 (Poeae type)	Correct (family or below)	147368	Pooideae	Correct (family or below)	147368	Pooideae	Correct (family or below)
gi|319414380|gb|HQ824816.1|	3414	Liriodendron chinense	3414	Liriodendron chinense	Correct (family or below)	3401	Magnoliaceae	Correct (family or below)	232347	Magnoliidae	Correct (above family)	3401	Magnoliaceae	Correct (family or below)
gi|319918000|gb|FJ913204.1|	13813	Nothoceros aenigmaticus	13813	Nothoceros aenigmaticus	Correct (family or below)
gi|3218419|emb|AJ009116.1|	49225	Triticum dicoccon	4564	Triticum	Correct (family or below)				77602	Triticum zhukovskyi	Incorrect
gi|3218421|emb|AJ009118.1|	4486	Aegilops longissima	4486	Aegilops longissima	Correct (family or below)	4480	Aegilops	Correct (family or below)	147389	Triticeae	Correct (family or below)
gi|3218422|emb|AJ009119.1|	4487	Aegilops searsii	147389	Triticeae	Correct (family or below)	4480	Aegilops	Correct (family or below)	147389	Triticeae	Correct (family or below)	1648030	Triticinae	Correct (family or below)
gi|322424050|gb|HQ638326.1|	4062	Rauvolfia mannii	4056	Apocynaceae	Correct (family or below)	167487	Rauvolfioideae	Correct (family or below)	4056	Apocynaceae	Correct (family or below)	167487	Rauvolfioideae	Correct (family or below)
gi|323444312|gb|HQ218390.1|	3336	Picea omorika	3328	Picea	Correct (family or below)				3328	Picea	Correct (family or below)
gi|32347193|gb|AY159419.1|	3985	Mercurialis perennis	3985	Mercurialis perennis	Correct (family or below)	3977	Euphorbiaceae	Correct (family or below)	3977	Euphorbiaceae	Correct (family or below)	3977	Euphorbiaceae	Correct (family or below)
gi|323524346|gb|HQ333117.1|	21017	Betula alleghaniensis	2759	Eukaryota	Correct (above family)	2759	Eukaryota	Correct (above family)	2759	Eukaryota	Correct (above family)	2759	Eukaryota	Correct (above family)
gi|326785251|gb|HQ323822.1|	3516	Alnus incana	3514	Betulaceae	Correct (family or below)	3193	Embryophyta	Correct (above family)	3193	Embryophyta	Correct (above family)	3193	Embryophyta	Correct (above family)
gi|326785268|gb|HQ323839.1|	4002	Buxus sempervirens				1437183	Mesangiospermae	Correct (above family)				1437183	Mesangiospermae	Correct (above family)
gi|326785318|gb|HQ323889.1|	28472	Epipactis helleborine	14457	Epipactis	Correct (family or below)	14457	Epipactis	Correct (family or below)	158332	Epidendroideae	Correct (family or below)	14457	Epipactis	Correct (family or below)
gi|326785323|gb|HQ323894.1|	3991	Euphorbia characias	1334278	Esula	Correct (family or below)	1334278	Esula	Correct (family or below)	1334278	Esula	Correct (family or below)	1334278	Esula	Correct (family or below)
gi|326785386|gb|HQ323957.1|	13597	Ligustrum vulgare	1437201	Pentapetalae	Correct (above family)	1437201	Pentapetalae	Correct (above family)	1437201	Pentapetalae	Correct (above family)	1437201	Pentapetalae	Correct (above family)
gi|326785462|gb|HQ324033.1|	23265	Saxifraga rotundifolia	3798	Saxifraga	Correct (family or below)	3798	Saxifraga	Correct (family or below)	3798	Saxifraga	Correct (family or below)	3798	Saxifraga	Correct (family or below)
gi|326785466|gb|HQ324037.1|	23029	Sedum album	3784	Sedum	Correct (family or below)	3784	Sedum	Correct (family or below)	91145	Sedum rupestre	Incorrect	3781	Crassulaceae	Correct (family or below)
gi|326785504|gb|HQ324075.1|	19953	Valeriana officinalis	91882	campanulids	Correct (above family)	19952	Valeriana	Correct (family or below)	91882	campanulids	Correct (above family)	19952	Valeriana	Correct (family or below)
gi|326785511|gb|HQ324082.1|	3905	Vicia cracca	3904	Vicia	Correct (family or below)	1437183	Mesangiospermae	Correct (above family)	3904	Vicia	Correct (family or below)	1437183	Mesangiospermae	Correct (above family)
gi|3341718|gb|AF016645.1|	4519	Hordeum marinum	4512	Hordeum	Correct (family or below)	4512	Hordeum	Correct (family or below)	147368	Pooideae	Correct (family or below)
gi|338826017|gb|HQ183464.1|	4611	Cyperus alternifolius	4609	Cyperaceae	Correct (family or below)	4609	Cyperaceae	Correct (family or below)	1437183	Mesangiospermae	Correct (above family)	1437183	Mesangiospermae	Correct (above family)
gi|338826019|gb|HQ183466.1|	13529	Flagellaria indica	1437183	Mesangiospermae	Correct (above family)				1437183	Mesangiospermae	Correct (above family)
gi|338826025|gb|HQ183472.1|	4692	Lilium superbum	1437183	Mesangiospermae	Correct (above family)	1437183	Mesangiospermae	Correct (above family)	1437183	Mesangiospermae	Correct (above family)	1437183	Mesangiospermae	Correct (above family)
gi|339433936|gb|HQ599303.1|	13331	Akebia quinata	13331	Akebia quinata	Correct (family or below)	1437183	Mesangiospermae	Correct (above family)	91835	fabids	Incorrect	91835	fabids	Incorrect
gi|340545067|dbj|AB616689.1|	13429	Cinnamomum camphora	13429	Cinnamomum camphora	Correct (family or below)
gi|340649|gb|M36165.1|	4240	Ligularia calthifolia	1437201	Pentapetalae	Correct (above family)				1437201	Pentapetalae	Correct (above family)
gi|345287441|gb|HQ843294.1|	3589	Basella alba	71240	eudicotyledons	Correct (above family)	3524	Caryophyllales	Correct (above family)	71240	eudicotyledons	Correct (above family)	1437183	Mesangiospermae	Correct (above family)
gi|345287447|gb|HQ843297.1|	4366	Drosera capensis	71240	eudicotyledons	Correct (above family)	4363	Drosera	Correct (family or below)	71240	eudicotyledons	Correct (above family)	1437183	Mesangiospermae	Correct (above family)
gi|345287449|gb|HQ843298.1|	4373	Drosophyllum lusitanicum	71240	eudicotyledons	Correct (above family)	1437183	Mesangiospermae	Correct (above family)	71240	eudicotyledons	Correct (above family)	1437183	Mesangiospermae	Correct (above family)
gi|345287461|gb|HQ843304.1|	3538	Mirabilis jalapa	3524	Caryophyllales	Correct (above family)	3524	Caryophyllales	Correct (above family)	3524	Caryophyllales	Correct (above family)	3524	Caryophyllales	Correct (above family)
gi|345287463|gb|HQ843305.1|	3592	Mollugo verticillata	1437201	Pentapetalae	Correct (above family)	3524	Caryophyllales	Correct (above family)	1437201	Pentapetalae	Correct (above family)	3524	Caryophyllales	Correct (above family)
gi|345287465|gb|HQ843306.1|	4376	Nepenthes alata	1437201	Pentapetalae	Correct (above family)	1437201	Pentapetalae	Correct (above family)	1437201	Pentapetalae	Correct (above family)	1437201	Pentapetalae	Correct (above family)
gi|345287469|gb|HQ843308.1|	3597	Pereskia aculeata	71240	eudicotyledons	Correct (above family)	3524	Caryophyllales	Correct (above family)	71240	eudicotyledons	Correct (above family)	1437183	Mesangiospermae	Correct (above family)
gi|345287471|gb|HQ843309.1|	3600	Phaulothamnus spinescens	3524	Caryophyllales	Correct (above family)	3524	Caryophyllales	Correct (above family)	3524	Caryophyllales	Correct (above family)	3524	Caryophyllales	Correct (above family)
gi|345287483|gb|HQ843315.1|	3533	Rivina humilis	3524	Caryophyllales	Correct (above family)	3524	Caryophyllales	Correct (above family)	3524	Caryophyllales	Correct (above family)	3524	Caryophyllales	Correct (above family)
gi|345287489|gb|HQ843318.1|	3535	Stegnosperma halimifolium	1437201	Pentapetalae	Correct (above family)	3524	Caryophyllales	Correct (above family)	1437201	Pentapetalae	Correct (above family)	3524	Caryophyllales	Correct (above family)
gi|345287491|gb|HQ843319.1|	13274	Stellaria media	3568	Caryophyllaceae	Correct (family or below)	1141488	Alsineae	Correct (family or below)	71240	eudicotyledons	Correct (above family)	1141488	Alsineae	Correct (family or below)
gi|345287503|gb|HQ843325.1|	3541	Bougainvillea glabra	1437201	Pentapetalae	Correct (above family)	3524	Caryophyllales	Correct (above family)	1437201	Pentapetalae	Correct (above family)	3524	Caryophyllales	Correct (above family)
gi|34770365|gb|CF542267.1|	4641	Musa acuminata	4641	Musa acuminata	Correct (family or below)
gi|347800094|dbj|AB669910.1|	3732	Diplotaxis erucoides	3732	Diplotaxis erucoides	Correct (family or below)	981071	Brassiceae	Correct (family or below)	3700	Brassicaceae	Correct (family or below)
gi|347977912|dbj|AB645783.1|	28979	Sciadopitys verticillata	28979	Sciadopitys verticillata	Correct (family or below)	3313	Pinidae	Correct (above family)	3313	Pinidae	Correct (above family)	3313	Pinidae	Correct (above family)
gi|350529056|dbj|AB645680.1|	13365	Bowenia serrulata	1437180	Acrogymnospermae	Correct (above family)	3297	Cycadales	Correct (above family)	1437180	Acrogymnospermae	Correct (above family)	3297	Cycadales	Correct (above family)
gi|3643538|emb|AJ004973.1|	3343	Pinus lambertiana	3337	Pinus	Correct (family or below)	139272	Strobus	Correct (family or below)	3337	Pinus	Correct (family or below)	3337	Pinus	Correct (family or below)
gi|38016230|gb|AY396152.1|	3679	Ecballium elaterium	3679	Ecballium elaterium	Correct (family or below)	3650	Cucurbitaceae	Correct (family or below)	3650	Cucurbitaceae	Correct (family or below)	3650	Cucurbitaceae	Correct (family or below)
gi|38016233|gb|AY396155.1|	3652	Bryonia dioica	3652	Bryonia dioica	Correct (family or below)	3650	Cucurbitaceae	Correct (family or below)	3650	Cucurbitaceae	Correct (family or below)	3660	Cucurbita	Incorrect
gi|380365196|gb|JG636442.1|	3472	Sanguinaria canadensis
gi|380848551|emb|FR716462.1|	3259	Equisetum giganteum	3259	Equisetum giganteum	Correct (family or below)
gi|383088928|gb|JG719686.1|	3389	Ephedra distachya
gi|392933180|gb|JX123717.1|	4205	Viburnum acerifolium	4205	Viburnum acerifolium	Correct (family or below)				105885	Symphoricarpos orbiculatus	Incorrect
gi|399108310|gb|JQ638596.1|	28529	Bretschneidera sinensis	28529	Bretschneidera sinensis	Correct (family or below)
gi|40363517|dbj|AB158140.1|	13579	Juncus effusus	13579	Juncus effusus	Correct (family or below)
gi|408898148|gb|JX661771.1|	4270	Byrsonima crassifolia	71275	rosids	Correct (above family)	3646	Malpighiales	Correct (above family)	71275	rosids	Correct (above family)	3646	Malpighiales	Correct (above family)
gi|408898170|gb|JX661782.1|	4009	Humiria balsamifera	71275	rosids	Correct (above family)	71275	rosids	Correct (above family)	71275	rosids	Correct (above family)	3646	Malpighiales	Correct (above family)
gi|408898563|gb|JX661969.1|	28974	Averrhoa carambola	1437183	Mesangiospermae	Correct (above family)	1437183	Mesangiospermae	Correct (above family)	1437183	Mesangiospermae	Correct (above family)	1437183	Mesangiospermae	Correct (above family)
gi|408898569|gb|JX661975.1|	22978	Chrysobalanus icaco	3646	Malpighiales	Correct (above family)				3646	Malpighiales	Correct (above family)
gi|408898592|gb|JX661998.1|	28504	Putranjiva roxburghii	28504	Putranjiva roxburghii	Correct (family or below)	1437183	Mesangiospermae	Correct (above family)	1437183	Mesangiospermae	Correct (above family)
gi|4150883|emb|Y14245.1|	4093	Nicotiana rustica	1437183	Mesangiospermae	Correct (above family)	1437201	Pentapetalae	Correct (above family)	1437183	Mesangiospermae	Correct (above family)	1437201	Pentapetalae	Correct (above family)
gi|4378809|gb|AF117912.1|	3335	Picea mariana	3328	Picea	Correct (family or below)				3328	Picea	Correct (family or below)
gi|440919433|gb|JX964793.1|	3645	Bertholletia excelsa
gi|4427050|gb|AF129058.1|	13583	Knema latericia	22274	Myristicaceae	Correct (family or below)	22274	Myristicaceae	Correct (family or below)	22274	Myristicaceae	Correct (family or below)	22274	Myristicaceae	Correct (family or below)
gi|4530518|gb|AF124753.1|	3353	Pinus banksiana	3353	Pinus banksiana	Correct (family or below)
gi|470953|gb|M82163.1|	3262	Equisetum hyemale	3193	Embryophyta	Correct (above family)	3257	Equisetum	Correct (family or below)	3193	Embryophyta	Correct (above family)	3193	Embryophyta	Correct (above family)
gi|47118087|gb|AY553195.1|	4485	Aegilops comosa	4485	Aegilops comosa	Correct (family or below)
gi|47157127|gb|AY497346.1|	21020	Castanea sativa	3503	Fagaceae	Correct (family or below)	3503	Fagaceae	Correct (family or below)	3503	Fagaceae	Correct (family or below)	3503	Fagaceae	Correct (family or below)
gi|482840884|dbj|AB715178.1|	3383	Gnetum ula	3380	Gnetum	Correct (family or below)	3380	Gnetum	Correct (family or below)	3380	Gnetum	Correct (family or below)
gi|505282|emb|X60209.1|	4025	Acer platanoides	4022	Acer	Correct (family or below)	4022	Acer	Correct (family or below)	4022	Acer	Correct (family or below)	4022	Acer	Correct (family or below)
gi|52033535|gb|CV191345.1|	13258	Saruma henryi
gi|56791483|gb|AY832055.1|	3305	Zamia integrifolia	3305	Zamia integrifolia	Correct (family or below)				54799	Cycas taitungensis	Incorrect
gi|57157821|dbj|AB183694.1|	28477	Symplocarpus foetidus	15095	Symplocarpus	Correct (family or below)				477955	Symplocarpus renifolius	Incorrect
gi|57283548|emb|AJ704411.1|	28528	Pinus mugo	3318	Pinaceae	Correct (family or below)	3337	Pinus	Correct (family or below)	3318	Pinaceae	Correct (family or below)	3337	Pinus	Correct (family or below)
gi|57283560|emb|AJ704417.1|	13216	Piper nigrum	16736	Piperales	Correct (above family)	16736	Piperales	Correct (above family)	16736	Piperales	Correct (above family)	16736	Piperales	Correct (above family)
gi|57283562|emb|AJ704418.1|	3429	Calycanthus floridus	3398	Magnoliopsida	Correct (above family)	3427	Calycanthaceae	Correct (family or below)	3398	Magnoliopsida	Correct (above family)	3427	Calycanthaceae	Correct (family or below)
gi|57283566|emb|AJ704420.1|	3406	Magnolia grandiflora	3398	Magnoliopsida	Correct (above family)	3400	Magnoliales	Correct (above family)	3398	Magnoliopsida	Correct (above family)	3400	Magnoliales	Correct (above family)
gi|57283584|emb|AJ704429.1|	3527	Phytolacca americana	3524	Caryophyllales	Correct (above family)	3524	Caryophyllales	Correct (above family)	3524	Caryophyllales	Correct (above family)	3524	Caryophyllales	Correct (above family)
gi|57283588|emb|AJ704431.1|	3567	Amaranthus caudatus	1437201	Pentapetalae	Correct (above family)	3524	Caryophyllales	Correct (above family)	1437201	Pentapetalae	Correct (above family)	3524	Caryophyllales	Correct (above family)
gi|57283596|emb|AJ704435.1|	3560	Oxybasis rubra	3560	Oxybasis rubra	Correct (family or below)	1437201	Pentapetalae	Correct (above family)	1437201	Pentapetalae	Correct (above family)	1437201	Pentapetalae	Correct (above family)
gi|57283600|emb|AJ704437.1|	4397	Hamamelis virginiana	71240	eudicotyledons	Correct (above family)	1437201	Pentapetalae	Correct (above family)	71240	eudicotyledons	Correct (above family)	1437201	Pentapetalae	Correct (above family)
gi|58397697|gb|AY870895.1|	4220	Artemisia vulgaris	4220	Artemisia vulgaris	Correct (family or below)
gi|604064669|gb|KF897631.1|	28483	Prospero autumnale	28483	Prospero autumnale	Correct (family or below)				82038	Prospero	Correct (family or below)
gi|62638153|gb|AY993985.1|	3677	Trichosanthes kirilowii
gi|62740344|dbj|AB180843.1|	4690	Lilium longiflorum	112509	Hordeum vulgare subsp. Vulgare	Incorrect
gi|655168075|gb|KJ647362.1|	4744	Commelina communis	4744	Commelina communis	Correct (family or below)
gi|66267125|gb|DR007252.1|	4540	Panicum miliaceum	359160	BOP clade	Incorrect				359160	BOP clade	Incorrect
gi|666696430|gb|KJ617092.1|	4349	Pterospora andromedea	4349	Pterospora andromedea	Correct (family or below)
gi|672094602|emb|LM993268.1|	4443	Camellia japonica	4443	Camellia japonica	Correct (family or below)
gi|69215892|gb|DQ069437.1|	4733	Typha latifolia	1437197	Petrosaviidae	Correct (above family)	1437197	Petrosaviidae	Correct (above family)	1437197	Petrosaviidae	Correct (above family)	1437197	Petrosaviidae	Correct (above family)
gi|70972038|gb|DR741957.1|	4073	Capsicum frutescens	1	root					1	root
gi|7208803|emb|AJ272184.1|	29583	Funaria hygrometrica	2759	Eukaryota	Correct (above family)	2759	Eukaryota	Correct (above family)	2759	Eukaryota	Correct (above family)	2759	Eukaryota	Correct (above family)
gi|722735206|dbj|LC010310.1|	13727	Thujopsis dolabrata	13727	Thujopsis dolabrata	Correct (family or below)
gi|7341075|gb|AF191774.1|	3908	Vicia sativa	3908	Vicia sativa	Correct (family or below)				200969	Vicia grandiflora	Incorrect
gi|7341079|gb|AF191778.1|	3912	Vicia narbonensis	3912	Vicia narbonensis	Correct (family or below)				29753	Vicia pannonica	Incorrect
gi|74053586|gb|DQ156930.1|	2709	Citrus cavaleriei
gi|7529302|emb|AJ288879.1|	19767	Beta corolliflora	19767	Beta corolliflora	Correct (family or below)				45494	Beta nana	Incorrect
gi|761232437|gb|KM672447.1|	3348	Pinus strobus	3348	Pinus strobus	Correct (family or below)	3337	Pinus	Correct (family or below)	3352	Pinus taeda	Incorrect	58024	Spermatophyta	Correct (above family)
gi|7677165|gb|AF190318.1|	3240	Psilotum nudum	3240	Psilotum nudum	Correct (family or below)				51953	Elaeis guineensis	Incorrect
gi|77863179|gb|DQ174445.1|	3866	Leucaena leucocephala	3866	Leucaena leucocephala	Correct (family or below)				3807	mimosoid clade	Correct (family or below)
gi|814616141|gb|KM008007.1|	13821	Pteris vittata	13819	Pteridaceae	Correct (family or below)				375903	Ceratopteris cornuta	Incorrect
gi|84646096|gb|DW359550.1|	13230	Prosopis juliflora	3807	mimosoid clade	Correct (above family)	163487	Mimoseae	Correct (family or below)	3807	mimosoid clade	Correct (above family)	163487	Mimoseae	Correct (family or below)
gi|860915|emb|X87828.1|	4075	Datura inoxia	4075	Datura inoxia	Correct (family or below)				4107	Solanum	Incorrect
gi|90568192|emb|AM183310.1|	4460	Colocasia esculenta	4460	Colocasia esculenta	Correct (family or below)
gi|916435856|gb|KR825451.1|	3281	Onoclea sensibilis	1203511	Aspleniineae	Correct (above family)	1203511	Aspleniineae	Correct (above family)	1203511	Aspleniineae	Correct (above family)	1203511	Aspleniineae	Correct (above family)
gi|916439582|gb|KT177196.1|	13447	Conium maculatum	91882	campanulids	Correct (above family)	241778	Apioideae	Correct (family or below)	91882	campanulids	Correct (above family)	91882	campanulids	Correct (above family)
gi|91753655|gb|EB390416.1|	3498	Morus alba
gi|937636225|gb|KT740408.1|	13363	Borago officinalis	13363	Borago officinalis	Correct (family or below)	91888	lamiids	Correct (above family)	1437201	Pentapetalae	Correct (above family)	91888	lamiids	Correct (above family)
gi|937636243|gb|KT740417.1|	4323	Icacina mannii	71240	eudicotyledons	Correct (above family)	1437201	Pentapetalae	Correct (above family)	71240	eudicotyledons	Correct (above family)	1437201	Pentapetalae	Correct (above family)
gi|937636361|gb|KT740476.1|	28496	Sphenoclea zeylanica	1437183	Mesangiospermae	Correct (above family)	1437183	Mesangiospermae	Correct (above family)	1437183	Mesangiospermae	Correct (above family)
gi|937636365|gb|KT740478.1|	23278	Vahlia capensis	1437183	Mesangiospermae	Correct (above family)	1437183	Mesangiospermae	Correct (above family)	1437183	Mesangiospermae	Correct (above family)	1437183	Mesangiospermae	Correct (above family)
gi|963022|emb|X54884.1|	13023	Calochlaena dubia
gi|984911772|gb|KT457354.1|	28955	Euphorbia marginata	1334443	Chamaesyce	Correct (family or below)	1334443	Chamaesyce	Correct (family or below)	1437183	Mesangiospermae	Correct (above family)	71275	rosids	Correct (above family)
gi|984911786|gb|KT457361.1|	4035	Oxalis dillenii	1437201	Pentapetalae	Correct (above family)	4033	Oxalidaceae	Correct (family or below)	1437183	Mesangiospermae	Correct (above family)	1437183	Mesangiospermae	Correct (above family)
gi|984911806|gb|KT457371.1|	3911	Vicia villosa	3814	Papilionoideae	Correct (family or below)	163743	Fabeae	Correct (family or below)	3814	Papilionoideae	Correct (family or below)	163743	Fabeae	Correct (family or below)
gi|984915460|gb|KT459261.1|	20408	Astragalus canadensis	3814	Papilionoideae	Correct (family or below)				3814	Papilionoideae	Correct (family or below)
gi|984915484|gb|KT459285.1|	20805	Oxytropis lambertii	3814	Papilionoideae	Correct (family or below)				3814	Papilionoideae	Correct (family or below)
			Total assigned	228	0.912	Total assigned	129	0.516	Total assigned	190	0.76	Total assigned	114	0.456
			Incorrect	7	0.0307018	Incorrect	0	0	Incorrect	38	0.2	Incorrect	5	0.0438596
			Correct	221	0.969298	Correct	129	1	Correct	152	0.8	Correct	109	0.95614
			Correct to above family	80	0.350877	Correct to above family	60	0.465116	Correct to above family	89	0.468421	Correct to above family	69	0.605263
			Correct to family or below	141	0.618421	Correct to family or below	69	0.534884	Correct to family or below	63	0.331579	Correct to family or below	40	0.350877

## Sheet: Mammalia
Supplementary table 2: Accuracy test results. These two worksheets (Embryophyta and Mammalia) detail the results of the PIA and MEGAN analyses on 250 GenBank sequences of known origin. The original reads are detailed in columns 1-3. The control columns refer to analyses where the initial BLAST search was performed against the full GenBank database (downloaded on 05-09-2019). The exclusion columns…
Rows in bold indicate that the exclusion condition performed better than the control condition for either method.
Read identifier	Original FASTA		Control MEGAN			Control PIA			Exclusion MEGAN			Exclusion PIA
	ID	Name	ID	Name	Status	ID	Name	Status	ID	Name	Status	ID	Name	Status
gi|10086292|gb|AF254437.1|	9997	Spermophilus citellus	9997	Spermophilus citellus	Correct (family or below)
gi|1015567502|gb|KT008958.1|	9837	Camelus bactrianus	9836	Camelus	Correct (family or below)	9836	Camelus	Correct (family or below)	419612	Camelus ferus	Incorrect	314145	Laurasiatheria	Correct (above family)
gi|1015567566|gb|KT008990.1|	9886	Muntiacus reevesi	9885	Muntiacus	Correct (family or below)	9885	Muntiacus	Correct (family or below)	9885	Muntiacus	Correct (family or below)	9885	Muntiacus	Correct (family or below)
gi|1015567586|gb|KT009000.1|	10138	Hystrix africaeaustralis	10138	Hystrix africaeaustralis	Correct (family or below)	314146	Euarchontoglires	Correct (above family)	13513	Eulemur	Incorrect
gi|10442809|gb|AY007203.1|	29088	Neomonachus schauinslandi	379584	Caniformia	Correct (above family)	9709	Phocidae	Correct (family or below)	379584	Caniformia	Correct (above family)	379584	Caniformia	Correct (above family)
gi|1064244856|gb|KX788914.1|	38776	Phascogale calura	7776	Gnathostomata	Correct (above family)				7776	Gnathostomata	Correct (above family)
gi|10803178|emb|AJ270468.1|	9391	Amblysomus hottentotus	9391	Amblysomus hottentotus	Correct (family or below)				185453	Chrysochloris asiatica	Incorrect
gi|10803354|emb|AJ270464.1|	29137	Dugong dugon	311790	Afrotheria	Correct (above family)	311790	Afrotheria	Correct (above family)	311790	Afrotheria	Correct (above family)	311790	Afrotheria	Correct (above family)
gi|10803358|emb|AJ270466.1|	9371	Echinops telfairi	9371	Echinops telfairi	Correct (family or below)	9347	Eutheria	Correct (above family)	9371	Echinops telfairi	Correct (family or below)	9347	Eutheria	Correct (above family)
gi|1087169561|gb|KX755860.1|	27672	Perimyotis subflavus	27672	Perimyotis subflavus	Correct (family or below)				712816	Parastrellus hesperus	Incorrect
gi|10880478|gb|AF166356.1|	9858	Capreolus capreolus
gi|11066930|gb|AF300709.1|	9662	Meles meles	9662	Meles meles	Correct (family or below)
gi|111119440|gb|DQ668150.1|	38674	Onychomys torridus	337963	Neotominae	Correct (family or below)	337963	Neotominae	Correct (family or below)	10040	Peromyscus	Incorrect	10040	Peromyscus	Incorrect
gi|1122923|gb|U23559.1|	9642	Ursus thibetanus	9632	Ursidae	Correct (family or below)	9642	Ursus thibetanus	Correct (family or below)	9642	Ursus thibetanus	Correct (family or below)	9642	Ursus thibetanus	Correct (family or below)
gi|1127298429|gb|KY130500.1|	9279	Dasyurus viverrinus	9279	Dasyurus viverrinus	Correct (family or below)	9278	Dasyurus	Correct (family or below)	9277	Dasyuridae	Correct (family or below)	9278	Dasyurus	Correct (family or below)
gi|11558530|emb|AJ275604.1|	10068	Acomys cahirinus	326408	Deomyinae	Correct (family or below)	326408	Deomyinae	Correct (family or below)	337687	Muroidea	Correct (above family)	337687	Muroidea	Correct (above family)
gi|1174224|gb|U44835.1|	9995	Marmota monax	337730	Marmotini	Correct (family or below)	337730	Marmotini	Correct (family or below)	337730	Marmotini	Correct (family or below)	337730	Marmotini	Correct (family or below)
gi|119639768|gb|EF152487.1|	32536	Acinonyx jubatus	9681	Felidae	Correct (family or below)	9681	Felidae	Correct (family or below)	338152	Felinae	Correct (above family)	9681	Felidae	Correct (family or below)
gi|1197588|gb|U46759.1|	9755	Physeter catodon	9755	Physeter catodon	Correct (family or below)				1	root
gi|1199748|dbj|D83221.1|	9792	Equus grevyi	314145	Laurasiatheria	Correct (above family)	9787	Perissodactyla	Correct (above family)	314145	Laurasiatheria	Correct (above family)	9787	Perissodactyla	Correct (above family)
gi|1199755|dbj|D83220.1|	9790	Equus burchellii	314145	Laurasiatheria	Correct (above family)	9787	Perissodactyla	Correct (above family)	314145	Laurasiatheria	Correct (above family)	9787	Perissodactyla	Correct (above family)
gi|1199757|dbj|D83223.1|	9798	Equus przewalskii	314145	Laurasiatheria	Correct (above family)	9789	Equus	Correct (family or below)	9347	Eutheria	Correct (above family)	9787	Perissodactyla	Correct (above family)
gi|12003108|gb|AF188615.1|	9764	Eschrichtius robustus	9764	Eschrichtius robustus	Correct (family or below)	9761	Mysticeti	Correct (above family)	314145	Laurasiatheria	Correct (above family)	9722	Odontoceti	Incorrect
gi|1215380239|gb|KY680181.1|	30551	Spilogale gracilis	30551	Spilogale gracilis	Correct (family or below)				30552	Spilogale putorius	Incorrect
gi|123720795|dbj|AB255387.1|	9378	Suncus murinus	9378	Suncus murinus	Correct (family or below)				36802	Crocidura russula	Incorrect
gi|124108807|gb|EF027240.1|	10129	Apodemus sylvaticus	39107	Murinae	Correct (family or below)	400053	Sylvaemus group	Correct (family or below)	39107	Murinae	Correct (family or below)	400053	Sylvaemus group	Correct (family or below)
gi|124108825|gb|EF027258.1|	13151	Micromys minutus	337687	Muroidea	Correct (above family)	337687	Muroidea	Correct (above family)	1	root		337687	Muroidea	Correct (above family)
gi|124108836|gb|EF027269.1|	39082	Muscardinus avellanarius	39082	Muscardinus avellanarius	Correct (family or below)	30650	Gliridae	Correct (family or below)	33553	Sciuromorpha	Correct (above family)	33553	Sciuromorpha	Correct (above family)
gi|125434086|gb|EF203892.1|	29089	Nomascus concolor	29089	Nomascus concolor	Correct (family or below)	29089	Nomascus concolor	Correct (family or below)	423450	Nomascus concolor furvogaster	Incorrect
gi|126428418|gb|EF094859.1|	9268	Didelphis marsupialis	9268	Didelphis marsupialis	Correct (family or below)				13616	Monodelphis domestica	Incorrect
gi|126428430|gb|EF094865.1|	9718	Pusa hispida	379584	Caniformia	Correct (above family)	379584	Caniformia	Correct (above family)	379584	Caniformia	Correct (above family)	379584	Caniformia	Correct (above family)
gi|126428434|gb|EF094867.1|	9707	Odobenus rosmarus	379584	Caniformia	Correct (above family)	379584	Caniformia	Correct (above family)	379584	Caniformia	Correct (above family)	379584	Caniformia	Correct (above family)
gi|126428452|gb|EF094876.1|	9807	Ceratotherium simum	1437010	Boreoeutheria	Correct (above family)	314145	Laurasiatheria	Correct (above family)	1437010	Boreoeutheria	Correct (above family)	314145	Laurasiatheria	Correct (above family)
gi|126428454|gb|EF094877.1|	9801	Tapirus terrestris	9787	Perissodactyla	Correct (above family)	9787	Perissodactyla	Correct (above family)	314145	Laurasiatheria	Correct (above family)	9787	Perissodactyla	Correct (above family)
gi|12711314|emb|AJ286813.1|	9321	Osphranter rufus	9321	Osphranter rufus	Correct (family or below)				9263	Metatheria	Correct (above family)
gi|1276459|gb|U24063.1|	9405	Pteropus hypomelanus	77225	Pteropodinae	Correct (family or below)	9401	Pteropus	Correct (family or below)	77225	Pteropodinae	Correct (family or below)	77225	Pteropodinae	Correct (family or below)
gi|1276461|gb|U24064.1|	9395	Tupaia glis	9394	Tupaia	Correct (family or below)	9394	Tupaia	Correct (family or below)	246437	Tupaia chinensis	Incorrect	1437010	Boreoeutheria	Correct (above family)
gi|1276467|gb|U24067.1|	30588	Leontopithecus rosalia	9498	Cebidae	Correct (family or below)	9480	Callitrichinae	Correct (family or below)	9479	Platyrrhini	Correct (above family)	9498	Cebidae	Correct (family or below)
gi|1276469|gb|U24068.1|	9463	Otolemur crassicaudatus	30610	Otolemur	Correct (family or below)	314146	Euarchontoglires	Correct (above family)	1437010	Boreoeutheria	Correct (above family)	1437010	Boreoeutheria	Correct (above family)
gi|129715198|gb|EF104993.1|	33562	Dromiciops gliroides	9263	Metatheria	Correct (above family)				9263	Metatheria	Correct (above family)
gi|13383228|dbj|AB042968.1|	9843	Vicugna vicugna	9843	Vicugna vicugna	Correct (family or below)
gi|1340366334|gb|MF802266.1|	9620	Cerdocyon thous	9620	Cerdocyon thous	Correct (family or below)	9608	Canidae	Correct (family or below)	68734	Lycalopex vetulus	Incorrect	425200	Lycalopex	Incorrect
gi|134147557|gb|EF122126.1|	9358	Choloepus hoffmanni	9357	Choloepus	Correct (family or below)
gi|13507293|gb|AF335732.1|	9622	Lycaon pictus	9622	Lycaon pictus	Correct (family or below)	9608	Canidae	Correct (family or below)	9608	Canidae	Correct (family or below)	9611	Canis	Incorrect
gi|13508496|gb|AY028924.1|	39053	Mammut americanum	9347	Eutheria	Correct (above family)	9347	Eutheria	Correct (above family)	207598	Homininae	Incorrect	207598	Homininae	Incorrect
gi|1354557130|gb|KY627781.1|	9999	Urocitellus parryii	337730	Marmotini	Correct (family or below)	1141645	Urocitellus	Correct (family or below)	337730	Marmotini	Correct (family or below)	9999	Urocitellus parryii	Correct (family or below)
gi|1378968822|gb|MH045107.1|	30531	Axis axis	34878	Cervinae	Correct (family or below)	34878	Cervinae	Correct (family or below)	9850	Cervidae	Correct (family or below)	34878	Cervinae	Correct (family or below)
gi|1378968896|gb|MG981750.1|	9887	Muntiacus vaginalis	9888	Muntiacus muntjak	Correct (family or below)	9885	Muntiacus	Correct (family or below)	9888	Muntiacus muntjak	Correct (family or below)	9885	Muntiacus	Correct (family or below)
gi|13872696|emb|AJ277519.1|	10085	Cricetomys gambianus	337673	Nesomyidae	Correct (family or below)	337673	Nesomyidae	Correct (family or below)	1437010	Boreoeutheria	Correct (above family)	337687	Muroidea	Correct (family or below)
gi|1394843958|gb|MF678371.1|	9668	Mustela putorius	379584	Caniformia	Correct (above family)	169418	Mustelinae	Correct (family or below)	379584	Caniformia	Correct (above family)	169418	Mustelinae	Correct (family or below)
gi|14039187|gb|AF258163.1|	13515	Eulemur fulvus	13513	Eulemur	Correct (family or below)	13513	Eulemur	Correct (family or below)	13513	Eulemur	Correct (family or below)	13513	Eulemur	Correct (family or below)
gi|14090989|gb|AF312188.1|	9778	Trichechus manatus	9778	Trichechus manatus	Correct (family or below)				37349	Mammuthus primigenius	Incorrect
gi|14090999|gb|AF312198.1|	9813	Procavia capensis	9813	Procavia capensis	Correct (family or below)				9783	Elephas maximus	Incorrect
gi|14423140|gb|AF339062.1|	13514	Eulemur coronatus	1437010	Boreoeutheria	Correct (above family)	1437010	Boreoeutheria	Correct (above family)	1437010	Boreoeutheria	Correct (above family)	1437010	Boreoeutheria	Correct (above family)
gi|14423148|gb|AF339066.1|	9556	Papio cynocephalus	9526	Catarrhini	Correct (above family)	9527	Cercopithecidae	Correct (family or below)	9526	Catarrhini	Correct (above family)	9527	Cercopithecidae	Correct (family or below)
gi|14423172|gb|AF339078.1|	30609	Galago moholi	9443	Primates	Correct (above family)				9479	Platyrrhini	Correct (above family)
gi|14549244|dbj|AB054406.1|	9770	Balaenoptera physalus	91561	Cetartiodactyla	Correct (above family)	9765	Balaenopteridae	Correct (family or below)	118798	Platanista gangetica	Incorrect
gi|14549266|dbj|AB054428.1|	9833	Hippopotamus amphibius	91561	Cetartiodactyla	Correct (above family)	91561	Cetartiodactyla	Correct (above family)	118798	Platanista gangetica	Incorrect
gi|14549277|dbj|AB054439.1|	9773	Megaptera novaeangliae	91561	Cetartiodactyla	Correct (above family)	9765	Balaenopteridae	Correct (family or below)	118798	Platanista gangetica	Incorrect
gi|14549321|dbj|AB054483.1|	9767	Balaenoptera acutorostrata	91561	Cetartiodactyla	Correct (above family)	9721	Cetacea	Correct (above family)	118798	Platanista gangetica	Incorrect
gi|146217407|gb|EF428213.1|	9402	Pteropus alecto	9401	Pteropus	Correct (family or below)	9401	Pteropus	Correct (family or below)	314145	Laurasiatheria	Correct (above family)	9397	Chiroptera	Correct (above family)
gi|146217411|gb|EF428215.1|	30548	Mephitis mephitis	30548	Mephitis mephitis	Correct (family or below)	379584	Caniformia	Correct (above family)	33554	Carnivora	Correct (above family)	379584	Caniformia	Correct (above family)
gi|146217413|gb|EF428216.1|	30554	Taxidea taxus	30554	Taxidea taxus	Correct (family or below)				169417	Lutrinae	Incorrect
gi|146217437|gb|EF428228.1|	33543	Zaglossus bruijni	9259	Tachyglossidae	Correct (family or below)				9258	Ornithorhynchus anatinus	Incorrect
gi|146225619|gb|EF538962.1|	27602	Balaena mysticetus	27602	Balaena mysticetus	Correct (family or below)
gi|148373497|gb|EF185866.1|	9829	Pecari tajacu	9829	Pecari tajacu	Correct (family or below)
gi|1485350705|gb|MG911161.1|	10179	Heliophobius argenteocinereus	10179	Heliophobius argenteocinereus	Correct (family or below)
gi|1485351093|gb|MG824881.1|	30627	Mesomys hispidus	30627	Mesomys hispidus	Correct (family or below)	30626	Mesomys	Correct (family or below)	30629	Mesomys stimulax	Incorrect	33550	Hystricomorpha	Correct (above family)
gi|1488288|gb|U62627.1|	9490	Saguinus oedipus	9498	Cebidae	Correct (family or below)	9498	Cebidae	Correct (family or below)	39432	Saimiri boliviensis boliviensis	Incorrect
gi|149777886|gb|EF641271.1|	9737	Stenella coeruleoalba	9737	Stenella coeruleoalba	Correct (family or below)				79784	Tursiops aduncus	Incorrect
gi|1520100882|gb|MK131146.1|	27622	Molossus molossus	27622	Molossus molossus	Correct (family or below)				1	root
gi|1529277115|gb|MK128954.1|	9426	Tonatia bidens	9426	Tonatia bidens	Correct (family or below)	314145	Laurasiatheria	Correct (above family)	9850	Cervidae	Incorrect	9850	Cervidae	Incorrect
gi|15407263|gb|AY035227.1|	9691	Panthera pardus	9691	Panthera pardus	Correct (family or below)	9688	Panthera	Correct (family or below)	9691	Panthera pardus	Correct (family or below)	9688	Panthera	Correct (family or below)
gi|158142117|gb|EU094444.1|	9305	Sarcophilus harrisii	9305	Sarcophilus harrisii	Correct (family or below)				9305	Sarcophilus harrisii	Correct (family or below)
gi|15822694|gb|AY046903.1|	9736	Stenella longirostris	9736	Stenella longirostris	Correct (family or below)	9736	Stenella longirostris	Correct (family or below)	9726	Delphinidae	Correct (family or below)	9736	Stenella longirostris	Correct (family or below)
gi|159086764|gb|EU087997.1|	9728	Delphinus delphis	314145	Laurasiatheria	Correct (above family)	91561	Cetartiodactyla	Correct (above family)	314145	Laurasiatheria	Correct (above family)	91561	Cetartiodactyla	Correct (above family)
gi|159086766|gb|EU087998.1|	9760	Ziphius cavirostris	314145	Laurasiatheria	Correct (above family)	91561	Cetartiodactyla	Correct (above family)	314145	Laurasiatheria	Correct (above family)	91561	Cetartiodactyla	Correct (above family)
gi|159086768|gb|EU087999.1|	9742	Phocoena phocoena	314145	Laurasiatheria	Correct (above family)	91561	Cetartiodactyla	Correct (above family)	314145	Laurasiatheria	Correct (above family)	91561	Cetartiodactyla	Correct (above family)
gi|159086772|gb|EU088001.1|	27610	Lagenorhynchus albirostris	314145	Laurasiatheria	Correct (above family)	91561	Cetartiodactyla	Correct (above family)	314145	Laurasiatheria	Correct (above family)	91561	Cetartiodactyla	Correct (above family)
gi|159086780|gb|EU088005.1|	27615	Kogia breviceps	314145	Laurasiatheria	Correct (above family)	91561	Cetartiodactyla	Correct (above family)	314145	Laurasiatheria	Correct (above family)	91561	Cetartiodactyla	Correct (above family)
gi|159902295|gb|EU121053.1|	27608	Cephalorhynchus eutropia	9726	Delphinidae	Correct (family or below)	9722	Odontoceti	Correct (above family)	9744	Phocoenoides dalli	Incorrect	9722	Odontoceti	Correct (above family)
gi|159902297|gb|EU121055.1|	9731	Globicephala melas	9726	Delphinidae	Correct (family or below)	9722	Odontoceti	Correct (above family)	9744	Phocoenoides dalli	Incorrect	9722	Odontoceti	Correct (above family)
gi|159902309|gb|EU121067.1|	9725	Inia geoffrensis	9722	Odontoceti	Correct (family or below)				9722	Odontoceti	Correct (family or below)
gi|164460293|gb|EU185521.1|	30601	Propithecus tattersalli	30601	Propithecus tattersalli	Correct (family or below)
gi|164708039|gb|EU362126.1|	29064	Panthera uncia	29064	Panthera uncia	Correct (family or below)	338153	Pantherinae	Correct (family or below)	9681	Felidae	Correct (family or below)	9681	Felidae	Correct (family or below)
gi|167838752|gb|EU444968.1|	9768	Balaenoptera borealis	9761	Mysticeti	Correct (above family)	9766	Balaenoptera	Correct (family or below)	310752	Balaenoptera acutorostrata scammoni	Incorrect	9761	Mysticeti	Correct (above family)
gi|167838753|gb|EU444969.1|	9769	Balaenoptera edeni	9761	Mysticeti	Correct (above family)	9766	Balaenoptera	Correct (family or below)	310752	Balaenoptera acutorostrata scammoni	Incorrect	9761	Mysticeti	Correct (above family)
gi|167838754|gb|EU444970.1|	33556	Balaenoptera bonaerensis	9761	Mysticeti	Correct (above family)	9766	Balaenoptera	Correct (family or below)	310752	Balaenoptera acutorostrata scammoni	Incorrect	9761	Mysticeti	Correct (above family)
gi|167838758|gb|EU444973.1|	27604	Caperea marginata	27604	Caperea marginata	Correct (family or below)	9761	Mysticeti	Correct (above family)	310752	Balaenoptera acutorostrata scammoni	Incorrect	9761	Mysticeti	Correct (above family)
gi|167838767|gb|EU444979.1|	27617	Mesoplodon peruvianus	9722	Odontoceti	Correct (above family)	9722	Odontoceti	Correct (above family)	9722	Odontoceti	Correct (above family)	9722	Odontoceti	Correct (above family)
gi|167838775|gb|EU444983.1|	9891	Antilocapra americana	35500	Pecora	Correct (above family)	35500	Pecora	Correct (above family)	35500	Pecora	Correct (above family)	35500	Pecora	Correct (above family)
gi|167838777|gb|EU444984.1|	9848	Tragulus napu	9848	Tragulus napu	Correct (family or below)	9845	Ruminantia	Correct (above family)	9895	Bovidae	Incorrect	91561	Cetartiodactyla	Correct (above family)
gi|167838783|gb|EU444987.1|	9840	Lama guanicoe	9835	Camelidae	Correct (family or below)				9835	Camelidae	Correct (family or below)
gi|1732472386|gb|MH602997.1|	37591	Urocitellus richardsonii	337730	Marmotini	Correct (family or below)	1141645	Urocitellus	Correct (family or below)	337730	Marmotini	Correct (family or below)	1141645	Urocitellus	Correct (family or below)
gi|176507|gb|M69080.1|	9534	Chlorocebus aethiops	9534	Chlorocebus aethiops	Correct (family or below)				1	root
gi|176613|gb|M64101.1|	9485	Callithrix sp.	1	root					1	root
gi|1783604768|gb|MK121622.1|	9974	Manis javanica
gi|1800457295|gb|MN062191.1|	9660	Martes americana	9658	Martes	Correct (family or below)	9658	Martes	Correct (family or below)	36722	Martes zibellina	Incorrect	36722	Martes zibellina	Incorrect
gi|18072244|gb|AY045528.1|	13557	Hapalemur griseus	13557	Hapalemur griseus	Correct (family or below)
gi|18150481|gb|AF419948.1|	29078	Eptesicus fuscus	29078	Eptesicus fuscus	Correct (family or below)
gi|183583960|gb|EU434733.1|	13125	Lynx lynx	13125	Lynx lynx	Correct (family or below)	9681	Felidae	Correct (family or below)	379583	Feliformia	Correct (above family)	9681	Felidae	Correct (family or below)
gi|186972169|gb|EU597755.1|	9514	Cebus albifrons	9514	Cebus albifrons	Correct (family or below)	9498	Cebidae	Correct (family or below)	314293	Simiiformes	Correct (above family)	9479	Platyrrhini	Correct (above family)
gi|186972171|gb|EU597760.1|	9508	Ateles fusciceps	9508	Ateles fusciceps	Correct (family or below)	314293	Simiiformes	Correct (above family)	1437010	Boreoeutheria	Correct (above family)
gi|19335978|emb|AJ438468.1|	9400	Cynopterus sphinx	9400	Cynopterus sphinx	Correct (family or below)	9397	Chiroptera	Correct (above family)	314145	Laurasiatheria	Correct (above family)	314145	Laurasiatheria	Correct (above family)
gi|19338161|emb|AJ438464.1|	30538	Vicugna pacos	9835	Camelidae	Correct (family or below)	9835	Camelidae	Correct (family or below)	9835	Camelidae	Correct (family or below)	9835	Camelidae	Correct (family or below)
gi|19338165|emb|AJ438469.1|	9419	Macrotus californicus	9419	Macrotus californicus	Correct (family or below)	9415	Phyllostomidae	Correct (family or below)	314145	Laurasiatheria	Correct (above family)
gi|19338171|emb|AJ438476.1|	9978	Ochotona princeps	9978	Ochotona princeps	Correct (family or below)
gi|19338173|emb|AJ438479.1|	9818	Orycteropus afer	1230840	Orycteropus afer afer	Incorrect				1230840	Orycteropus afer afer	Incorrect
gi|19338175|emb|AJ438487.1|	29082	Macroscelides proboscideus	29082	Macroscelides proboscideus	Correct (family or below)				28737	Elephantulus edwardii	Incorrect
gi|19338452|emb|AJ438481.1|	9375	Talpa europaea	9375	Talpa europaea	Correct (family or below)				37032	Suricata suricatta	Incorrect
gi|195976036|gb|EU680301.1|	9435	Myotis velifer
gi|197310989|gb|EU698989.1|	9735	Stenella attenuata	37035	Cephalorhynchus hectori	Incorrect	9726	Delphinidae	Correct (family or below)	314145	Laurasiatheria	Correct (above family)	9726	Delphinidae	Correct (family or below)
gi|198443746|gb|FJ001812.1|	29095	Akodon azarae	29095	Akodon azarae	Correct (family or below)				10154	Lagostomus maximus	Incorrect
gi|202512|gb|M63644.1|	10044	Phodopus sungorus	1	root					45333	Dwarf hamster endogenous retrovirus	Correct (family or below)
gi|2058707|gb|U94900.1|	9720	Phoca vitulina
gi|21064936|gb|AY098635.1|	9627	Vulpes vulpes	9608	Canidae	Correct (family or below)	9608	Canidae	Correct (family or below)	9608	Canidae	Correct (family or below)	9608	Canidae	Correct (family or below)
gi|2149849|gb|U93370.1|	9261	Tachyglossus aculeatus	9255	Monotremata	Correct (family or below)				9258	Ornithorhynchus anatinus	Incorrect
gi|215398827|gb|FJ434491.1|	9878	Odocoileus hemionus sitkensis	35500	Pecora	Correct (above family)	9881	Odocoileinae	Correct (family or below)	35500	Pecora	Correct (above family)	35500	Pecora	Correct (above family)
gi|21541257|emb|AJ309851.1|	29065	Martes martes
gi|21541260|emb|AJ309854.1|	9659	Martes foina
gi|21632154|gb|AY041647.1|	10072	Akodon boliviensis	10072	Akodon boliviensis	Correct (family or below)				337687	Muroidea	Correct (above family)
gi|21632174|gb|AY041667.1|	29127	Oxymycterus paramensis	29127	Oxymycterus paramensis	Correct (family or below)	40141	Sigmodontinae	Correct (family or below)	337687	Muroidea	Correct (above family)
gi|217656|dbj|D10844.1|	9863	Cervus nippon	35500	Pecora	Correct (above family)	9850	Cervidae	Correct (family or below)	35500	Pecora	Correct (above family)	34878	Cervinae	Correct (family or below)
gi|217759|dbj|D13463.1|	9849	Tragulus javanicus	9849	Tragulus javanicus	Correct (family or below)	9845	Ruminantia	Correct (above family)	35500	Pecora	Incorrect	35500	Pecora	Incorrect
gi|2198752|gb|U84666.1|	10141	Cavia porcellus	9526	Catarrhini	Incorrect				9526	Catarrhini	Incorrect
gi|225194270|gb|FJ440381.1|	9491	Saguinus imperator	9480	Callitrichinae	Correct (family or below)				57374	Leontopithecus chrysomelas	Incorrect
gi|225194361|gb|FJ440472.1|	9493	Callithrix pygmaea	9493	Callithrix pygmaea	Correct (family or below)				38039	Pitheciinae	Incorrect
gi|22651671|gb|AY099081.1|	9417	Artibeus jamaicensis	9417	Artibeus jamaicensis	Correct (family or below)
gi|227452715|gb|FJ866606.1|	9883	Hydropotes inermis				9850	Cervidae	Correct (family or below)	48560	Capreolus pygargus	Incorrect	9850	Cervidae	Correct (family or below)
gi|22798953|emb|AJ438195.1|	9805	Diceros bicornis	9803	Rhinocerotidae	Correct (family or below)	9803	Rhinocerotidae	Correct (family or below)	314145	Laurasiatheria	Correct (above family)	314145	Laurasiatheria	Correct (above family)
gi|22919|emb|X03338.1|	9465	Galago senegalensis	9465	Galago senegalensis	Correct (family or below)				376911	Strepsirrhini	Correct (above family)
gi|2407938|emb|X97911.1|	9315	Notamacropus eugenii	9315	Notamacropus eugenii	Correct (family or below)
gi|2408002|emb|X98221.1|	9302	Sminthopsis macroura	9302	Sminthopsis macroura	Correct (family or below)
gi|24459313|gb|AY102409.1|	9894	Giraffa camelopardalis	9894	Giraffa camelopardalis	Correct (family or below)				9895	Bovidae	Incorrect
gi|24528070|emb|AJ512844.2|	9678	Crocuta crocuta
gi|251752824|dbj|AB474908.1|	10181	Heterocephalus glaber	10181	Heterocephalus glaber	Correct (family or below)				742503	Tokudaia muenninki	Incorrect
gi|257782|gb|S46659.1|	13266	Smilodon fatalis	9681	Felidae	Correct (family or below)	9681	Felidae	Correct (family or below)	338152	Felinae	Correct (above family)	9682	Felis	Incorrect
gi|2642092|gb|AF032261.1|	30602	Eulemur macaco	9445	Lemuridae	Correct (family or below)	9445	Lemuridae	Correct (family or below)	1	root
gi|2642101|gb|AF032270.1|	9447	Lemur catta	376915	Lemuriformes	Correct (above family)	376915	Lemuriformes	Correct (above family)	376915	Lemuriformes	Correct (above family)	9445	Lemuridae	Correct (family or below)
gi|2642653|gb|AF034205.1|	9548	Macaca radiata	9526	Catarrhini	Correct (above family)	9526	Catarrhini	Correct (above family)	32524	Amniota	Correct (above family)	9526	Catarrhini	Correct (above family)
gi|2724137|gb|AF039143.1|	10030	Cricetulus longicaudatus	10030	Cricetulus longicaudatus	Correct (family or below)				10026	Cricetinae	Correct (family or below)
gi|290752100|emb|FN186109.1|	30535	Tayassu pecari	30535	Tayassu pecari	Correct (family or below)	35497	Suina	Correct (above family)	9821	Suidae	Incorrect	9821	Suidae	Incorrect
gi|2911493|gb|AF047606.1|	9802	Tapirus indicus	9802	Tapirus indicus	Correct (family or below)	314145	Laurasiatheria	Correct (above family)	314145	Laurasiatheria	Correct (above family)	314145	Laurasiatheria	Correct (above family)
gi|29169067|gb|AY231384.1|	9455	Varecia variegata	1437010	Boreoeutheria	Correct (above family)	376915	Lemuriformes	Correct (above family)	1437010	Boreoeutheria	Correct (above family)	1437010	Boreoeutheria	Correct (above family)
gi|29169075|gb|AY231388.1|	30591	Aotus azarai	9479	Platyrrhini	Correct (above family)	9504	Aotus	Correct (family or below)	9479	Platyrrhini	Correct (above family)	9479	Platyrrhini	Correct (above family)
gi|29169077|gb|AY231389.1|	9568	Mandrillus leucophaeus	9527	Cercopithecidae	Correct (family or below)	9527	Cercopithecidae	Correct (family or below)	9527	Cercopithecidae	Correct (family or below)	9527	Cercopithecidae	Correct (family or below)
gi|29469903|gb|AY230860.1|	9460	Cheirogaleus medius	9460	Cheirogaleus medius	Correct (family or below)
gi|302456044|gb|HM757842.1|	30594	Brachyteles arachnoides	314293	Simiiformes	Correct (above family)	38068	Atelinae	Correct (family or below)	1	root		9479	Platyrrhini	Correct (above family)
gi|302456057|gb|HM757855.1|	9502	Alouatta caraya	1	root		314293	Simiiformes	Correct (above family)	1	root		314293	Simiiformes	Correct (above family)
gi|30351940|emb|AJ532555.1|	10034	Cricetus cricetus	10034	Cricetus cricetus	Correct (family or below)				10036	Mesocricetus auratus	Incorrect
gi|307775532|gb|HQ022836.1|	10112	Mastomys natalensis	337687	Muroidea	Correct (above family)	39107	Murinae	Correct (family or below)	337687	Muroidea	Correct (above family)	10088	Mus	Incorrect
gi|313510451|gb|GU183530.1|	9700	Herpestes ichneumon	9700	Herpestes ichneumon	Correct (family or below)	9697	Herpestidae	Correct (family or below)	9697	Herpestidae	Correct (family or below)	9697	Herpestidae	Correct (family or below)
gi|320090305|gb|HQ148156.1|	39030	Apodemus agrarius	337687	Muroidea	Correct (above family)	337687	Muroidea	Correct (above family)	337687	Muroidea	Correct (above family)	337687	Muroidea	Correct (above family)
gi|320578997|gb|HQ730777.1|	9433	Miniopterus schreibersii	9433	Miniopterus schreibersii	Correct (family or below)
gi|32395699|gb|AY227663.1|	30608	Microcebus murinus
gi|326366817|gb|HQ825504.1|	9752	Kogia sima	1437010	Boreoeutheria	Correct (above family)	9721	Cetacea	Correct (above family)	1437010	Boreoeutheria	Correct (above family)	9722	Odontoceti	Correct (above family)
gi|332713795|gb|HQ652245.1|	30637	Nannospalax ehrenbergi	30636	Nannospalax	Correct (family or below)	30636	Nannospalax	Correct (family or below)	10061	Spalacinae	Correct (family or below)	30636	Nannospalax	Correct (family or below)
gi|33439792|gb|AY279389.1|	10166	Ctenodactylus gundi	10166	Ctenodactylus gundi	Correct (family or below)
gi|335058657|gb|HQ186240.1|	10172	Bathyergus suillus	10172	Bathyergus suillus	Correct (family or below)
gi|3386659|dbj|AB016200.1|	9470	Nycticebus coucang	9470	Nycticebus coucang	Correct (family or below)
gi|343100|gb|L03695.1|	10012	Thomomys townsendii	10012	Thomomys townsendii	Correct (family or below)				58087	Thoopterus nigrescens	Incorrect
gi|349801550|gb|JF938251.1|	30590	Alouatta belzebul	314293	Simiiformes	Correct (above family)	378855	Atelidae	Correct (family or below)	314293	Simiiformes	Correct (above family)	314293	Simiiformes	Correct (above family)
gi|349801580|gb|JF938266.1|	9482	Mico argentatus	314293	Simiiformes	Correct (above family)	9480	Callitrichinae	Correct (family or below)	314293	Simiiformes	Correct (above family)	9480	Callitrichinae	Correct (family or below)
gi|349801694|gb|JF938323.1|	9516	Cebus capucinus	314293	Simiiformes	Correct (above family)	38070	Cebinae	Correct (family or below)	314293	Simiiformes	Correct (above family)	38070	Cebinae	Correct (family or below)
gi|349801746|gb|JF938349.1|	9488	Saguinus mystax	314146	Euarchontoglires	Correct (above family)	9479	Platyrrhini	Correct (above family)	1	root		314293	Simiiformes	Correct (above family)
gi|349801788|gb|JF938370.1|	30598	Pithecia irrorata	1	root		314146	Euarchontoglires	Correct (above family)	1	root		314146	Euarchontoglires	Correct (above family)
gi|349802102|gb|JF938527.1|	9525	Chiropotes satanas	314293	Simiiformes	Correct (above family)	9479	Platyrrhini	Correct (above family)	314293	Simiiformes	Correct (above family)	314293	Simiiformes	Correct (above family)
gi|37693108|emb|AJ585772.1|	10009	Tamiasciurus hudsonicus	10009	Tamiasciurus hudsonicus	Correct (family or below)
gi|37962937|gb|AY354470.1|	9704	Zalophus californianus	33554	Carnivora	Correct (above family)	33554	Carnivora	Correct (above family)	33554	Carnivora	Correct (above family)	33554	Carnivora	Correct (above family)
gi|384111011|gb|JQ318678.1|	9275	Thylacinus cynocephalus	9275	Thylacinus cynocephalus	Correct (family or below)
gi|393196875|gb|JQ931471.1|	30596	Cacajao calvus	30596	Cacajao calvus	Correct (family or below)
gi|402711|gb|L14804.1|	9542	Macaca fuscata	9542	Macaca fuscata	Correct (family or below)	9526	Catarrhini	Correct (above family)	9604	Hominidae	Incorrect	207598	Homininae	Incorrect
gi|4028657|gb|AF111032.1|	9715	Mirounga leonina	379584	Caniformia	Correct (above family)	379584	Caniformia	Correct (above family)	379584	Caniformia	Correct (above family)	379584	Caniformia	Correct (above family)
gi|4028679|gb|AF111043.1|	29084	Arctocephalus forsteri	379584	Caniformia	Correct (above family)	9702	Otariidae	Correct (family or below)	379584	Caniformia	Correct (above family)	379584	Caniformia	Correct (above family)
gi|403065252|gb|JN935371.1|	9809	Rhinoceros unicornis	9809	Rhinoceros unicornis	Correct (family or below)	9808	Rhinoceros	Correct (family or below)	102233	Rhinoceros sondaicus	Incorrect	9803	Rhinocerotidae	Correct (family or below)
gi|4115639|dbj|AB015486.1|	9515	Sapajus apella	9498	Cebidae	Correct (family or below)	9498	Cebidae	Correct (family or below)	9483	Callithrix jacchus	Incorrect	9498	Cebidae	Correct (family or below)
gi|4115641|dbj|AB015487.1|	9505	Aotus trivirgatus	9505	Aotus trivirgatus	Correct (family or below)	9479	Platyrrhini	Correct (above family)	314293	Simiiformes	Correct (above family)	9498	Cebidae	Incorrect
gi|4115643|dbj|AB015488.1|	9521	Saimiri sciureus	9498	Cebidae	Correct (family or below)	9498	Cebidae	Correct (family or below)	9483	Callithrix jacchus	Incorrect	9498	Cebidae	Correct (family or below)
gi|4127579|emb|AJ012443.1|	9354	Bradypus tridactylus	948953	Folivora	Correct (above family)	948953	Folivora	Correct (above family)	948952	Vermilingua	Incorrect	948952	Vermilingua	Incorrect
gi|4127632|emb|AJ012436.1|	27675	Choloepus didactylus	948950	Pilosa	Correct (above family)	948950	Pilosa	Correct (above family)	948952	Vermilingua	Incorrect	948952	Vermilingua	Incorrect
gi|4127778|emb|AJ012441.1|	9361	Dasypus novemcinctus	9361	Dasypus novemcinctus	Correct (family or below)	9348	Xenarthra	Correct (above family)	9348	Xenarthra	Correct (above family)	948952	Vermilingua	Incorrect
gi|41394247|gb|AY441659.1|	30611	Otolemur garnettii	30610	Otolemur	Correct (family or below)
gi|41394278|gb|AY441690.1|	31869	Daubentonia madagascariensis	31869	Daubentonia madagascariensis	Correct (family or below)				1	root
gi|41394318|gb|AY441730.1|	9468	Loris tardigradus	9468	Loris tardigradus	Correct (family or below)				9461	Lorisidae	Correct (family or below)
gi|417985|gb|L21864.1|	9649	Ailurus fulgens	424585	Ailurus fulgens styani	Incorrect	314145	Laurasiatheria	Correct (above family)	424585	Ailurus fulgens styani	Incorrect	314145	Laurasiatheria	Correct (above family)
gi|418001|gb|L21870.1|	9643	Ursus americanus	9643	Ursus americanus	Correct (family or below)	9632	Ursidae	Correct (family or below)	9639	Ursus	Correct (family or below)	33554	Carnivora	Correct (family or below)
gi|418012|gb|L21859.1|	9634	Helarctos malayanus	9632	Ursidae	Correct (family or below)	9632	Ursidae	Correct (family or below)	379584	Caniformia	Correct (above family)	9639	Ursus	Incorrect
gi|418026|gb|L21861.1|	9636	Melursus ursinus	9636	Melursus ursinus	Correct (family or below)	9632	Ursidae	Correct (family or below)	9639	Ursus	Incorrect	9639	Ursus	Incorrect
gi|418031|gb|L21867.1|	9651	Nasua nasua	9651	Nasua nasua	Correct (family or below)	1437010	Boreoeutheria	Correct (above family)	10161	Echimyidae	Incorrect
gi|418042|gb|L21865.1|	29067	Potos flavus	29067	Potos flavus	Correct (family or below)				461413	Proechimys gularis	Incorrect
gi|418053|gb|L21860.1|	9638	Tremarctos ornatus	9638	Tremarctos ornatus	Correct (family or below)	9632	Ursidae	Correct (family or below)	314145	Laurasiatheria	Correct (above family)	379584	Caniformia	Correct (above family)
gi|441111|gb|U04964.1|	30667	Lasiorhinus krefftii	30667	Lasiorhinus krefftii	Correct (family or below)				29139	Vombatus ursinus	Incorrect
gi|44241590|gb|AY539671.1|	9588	Hylobates muelleri	1	root					1	root
gi|443934936|gb|JX045658.1|	9683	Felis silvestris	463207	Felis silvestris silvestris	Incorrect	9682	Felis	Correct (family or below)	463207	Felis silvestris silvestris	Incorrect	9682	Felis	Correct (family or below)
gi|4511893|gb|AF055513.1|	9267	Didelphis virginiana	9267	Didelphis virginiana	Correct (family or below)	9263	Metatheria	Correct (above family)	29139	Vombatus ursinus	Incorrect
gi|4567079|gb|AF126188.1|	30532	Dama dama	30532	Dama dama	Correct (family or below)				9940	Ovis aries	Incorrect
gi|4567082|gb|AF126191.1|	9852	Alces alces	9852	Alces alces	Correct (family or below)				72004	Bos mutus	Incorrect
gi|4567088|gb|AF126197.1|	9870	Rangifer tarandus	9870	Rangifer tarandus	Correct (family or below)				72004	Bos mutus	Incorrect
gi|4666270|dbj|AB010585.1|	38241	Globicephala macrorhynchus	38241	Globicephala macrorhynchus	Correct (family or below)	9726	Delphinidae	Correct (family or below)	91561	Cetartiodactyla	Correct (above family)
gi|47027641|gb|AY532313.1|	9510	Ateles paniscus	9510	Ateles paniscus	Correct (family or below)				9498	Cebidae	Incorrect
gi|47231370|gb|AY601556.1|	9592	Gorilla	1	root					1	root
gi|49036689|gb|AY541708.1|	29092	Microtus agrestis	29092	Microtus agrestis	Correct (family or below)	337687	Muroidea	Correct (above family)	39107	Murinae	Incorrect	39107	Murinae	Incorrect
gi|493026|gb|U09225.1|	30589	Alouatta palliata	30589	Alouatta palliata	Correct (family or below)				9606	Homo sapiens	Incorrect
gi|51127201|emb|AJ627423.1|	9601	Pongo abelii	9601	Pongo abelii	Correct (family or below)				9600	Pongo pygmaeus	Incorrect
gi|51235661|gb|AY588991.1|	38671	Perognathus parvus	38671	Perognathus parvus	Correct (family or below)				145408	Chaetodipus californicus	Incorrect
gi|51235670|gb|AY589000.1|	10013	Thomomys bottae	10013	Thomomys bottae	Correct (family or below)				145408	Chaetodipus californicus	Incorrect
gi|5360154|gb|AF156298.1|	27606	Eubalaena glacialis	27606	Eubalaena glacialis	Correct (family or below)
gi|538507|gb|L36227.1|	9337	Trichosurus vulpecula	9337	Trichosurus vulpecula	Correct (family or below)				9606	Homo sapiens	Incorrect
gi|5420392|emb|AJ388473.1|	9888	Muntiacus muntjak	9888	Muntiacus muntjak	Correct (family or below)
gi|5639672|gb|AF110305.1|	9546	Macaca sylvanus	9546	Macaca sylvanus	Correct (family or below)
gi|565384625|gb|KF670697.1|	9319	Osphranter robustus	9319	Osphranter robustus	Correct (family or below)
gi|56718821|gb|AY726632.1|	9739	Tursiops truncatus	9721	Cetacea	Correct (above family)	9721	Cetacea	Correct (above family)	9721	Cetacea	Correct (above family)	9721	Cetacea	Correct (above family)
gi|58201507|gb|AY739243.1|	9507	Ateles belzebuth	9507	Ateles belzebuth	Correct (family or below)
gi|58201511|gb|AY739247.1|	9538	Erythrocebus patas	9528	Cercopithecinae	Correct (family or below)				9528	Cercopithecinae	Correct (family or below)
gi|58201529|gb|AY739265.1|	9487	Saguinus fuscicollis	9487	Saguinus fuscicollis	Correct (family or below)
gi|58371974|emb|AJ543958.1|	9657	Lutra lutra	9655	Mustelidae	Correct (family or below)				452646	Neovison vison	Incorrect
gi|59803188|gb|AY911307.1|	9771	Balaenoptera musculus	9771	Balaenoptera musculus	Correct (family or below)
gi|61677254|gb|AY952144.1|	9614	Canis latrans	9614	Canis latrans	Correct (family or below)	9611	Canis	Correct (family or below)	9611	Canis	Correct (family or below)	9611	Canis	Correct (family or below)
gi|6358634|gb|AF154868.1|	9355	Bradypus variegatus	948953	Folivora	Correct (above family)	948953	Folivora	Correct (above family)	33213	Bilateria	Correct (above family)	1437010	Boreoeutheria	Incorrect
gi|640035|gb|U18118.1|	9749	Delphinapterus leucas	9722	Odontoceti	Correct (above family)	9722	Odontoceti	Correct (above family)	9722	Odontoceti	Correct (above family)	9722	Odontoceti	Correct (above family)
gi|649476477|gb|KJ461016.1|	10032	Cricetulus migratorius	10032	Cricetulus migratorius	Correct (family or below)				329629	Cricetulus barabensis	Incorrect
gi|6681459|dbj|AB013753.1|	9551	Macaca assamensis	9539	Macaca	Correct (family or below)				9539	Macaca	Correct (family or below)
gi|6681461|dbj|AB013754.1|	9540	Macaca arctoides	9544	Macaca mulatta	Incorrect				9539	Macaca	Correct (family or below)
gi|6681471|dbj|AB013759.1|	9555	Papio anubis	9554	Papio	Correct (family or below)				9557	Papio hamadryas	Incorrect
gi|673540903|gb|KM206895.1|	30586	Saguinus midas	1437010	Boreoeutheria	Correct (above family)	314146	Euarchontoglires	Correct (above family)	9347	Eutheria	Correct (above family)	314146	Euarchontoglires	Correct (above family)
gi|68131962|gb|DQ018769.1|	9317	Macropus giganteus	38609	Diprotodontia	Correct (above family)				38609	Diprotodontia	Correct (above family)
gi|696197314|gb|KJ863397.1|	9711	Halichoerus grypus	9711	Halichoerus grypus	Correct (family or below)							9709	Phocidae	Correct (family or below)
gi|7523598|gb|AF174577.1|	9860	Cervus elaphus	35500	Pecora	Correct (above family)				9913	Bos taurus	Incorrect
gi|7672539|gb|AF140585.1|	29086	Hydrurga leptonyx	29086	Hydrurga leptonyx	Correct (family or below)
gi|77025023|gb|DQ191953.1|	9477	Cephalopachus bancanus	9477	Cephalopachus bancanus	Correct (family or below)	9475	Tarsiidae	Correct (family or below)				9443	Primates	Correct (above family)
gi|8247243|emb|AJ403967.1|	9793	Equus asinus	9789	Equus	Correct (family or below)	9787	Perissodactyla	Correct (above family)	9796	Equus caballus	Incorrect	9787	Perissodactyla	Correct (above family)
gi|8247347|emb|AJ403970.1|	9310	Potorous tridactylus	38609	Diprotodontia	Correct (above family)	9309	Potorous	Correct (family or below)	38609	Diprotodontia	Correct (above family)	38609	Diprotodontia	Correct (above family)
gi|827884661|dbj|LC036393.1|	9530	Cercocebus torquatus	314293	Simiiformes	Correct (above family)	9527	Cercopithecidae	Correct (family or below)	1	root		9527	Cercopithecidae	Correct (family or below)
gi|8572255|gb|AF276034.1|	9838	Camelus dromedarius	30538	Vicugna pacos	Incorrect
gi|8575717|gb|AF266473.1|	32538	Leopardus pardalis	32538	Leopardus pardalis	Correct (family or below)	46841	Leopardus	Correct (family or below)	338152	Felinae	Correct (family or below)	338152	Felinae	Correct (above family)
gi|8575719|gb|AF266474.1|	9690	Panthera onca	9690	Panthera onca	Correct (family or below)	9681	Felidae	Correct (family or below)	379583	Feliformia	Correct (above family)	9681	Felidae	Correct (family or below)
gi|882221|gb|U18905.1|	29073	Ursus maritimus	9639	Ursus	Correct (family or below)	9639	Ursus	Correct (family or below)	9639	Ursus	Correct (family or below)	9639	Ursus	Correct (family or below)
gi|8886574|gb|AF172181.1|	9572	Colobus polykomos	314293	Simiiformes	Correct (above family)	9526	Catarrhini	Correct (above family)	314293	Simiiformes	Correct (above family)	9526	Catarrhini	Correct (above family)
gi|8886586|gb|AF172187.1|	9561	Mandrillus sphinx	314293	Simiiformes	Correct (above family)	9527	Cercopithecidae	Correct (family or below)	314293	Simiiformes	Correct (above family)	9527	Cercopithecidae	Correct (family or below)
gi|8886602|gb|AF172195.1|	9580	Hylobates lar	9526	Catarrhini	Correct (above family)	9526	Catarrhini	Correct (above family)	9526	Catarrhini	Correct (above family)	9526	Catarrhini	Correct (above family)
gi|8886604|gb|AF172196.1|	9590	Symphalangus syndactylus	9526	Catarrhini	Correct (above family)	9526	Catarrhini	Correct (above family)	314293	Simiiformes	Correct (above family)	9526	Catarrhini	Correct (above family)
gi|8886610|gb|AF172199.1|	9503	Alouatta seniculus	9479	Platyrrhini	Correct (above family)	9479	Platyrrhini	Correct (above family)	314293	Simiiformes	Correct (above family)	9480	Callitrichinae	Incorrect
gi|8886616|gb|AF172202.1|	9495	Callimico goeldii	314293	Simiiformes	Correct (above family)	9479	Platyrrhini	Correct (above family)	314293	Simiiformes	Correct (above family)	9480	Callitrichinae	Correct (family or below)
gi|8886618|gb|AF172203.1|	9523	Plecturocebus moloch	314293	Simiiformes	Correct (above family)	314293	Simiiformes	Correct (above family)	314293	Simiiformes	Correct (above family)	9480	Callitrichinae	Incorrect
gi|8886630|gb|AF172209.1|	9472	Perodicticus potto
gi|91075903|gb|DQ464010.1|	9794	Equus hemionus	9789	Equus	Correct (family or below)	9794	Equus hemionus	Correct (family or below)	9789	Equus	Correct (family or below)	9789	Equus	Correct (family or below)
gi|9454270|gb|AF276820.1|	9365	Erinaceus europaeus	9365	Erinaceus europaeus	Correct (family or below)
gi|9652294|gb|AF283421.1|	29117	Nectomys squamipes	29117	Nectomys squamipes	Correct (family or below)
gi|998320|gb|U33853.1|	10047	Meriones unguiculatus	10066	Muridae	Correct (family or below)				39107	Murinae	Incorrect
gi|998336|gb|U33864.1|	30640	Sciurus carolinensis	30640	Sciurus carolinensis	Correct (family or below)				39107	Murinae	Incorrect
			Total assigned	234	0.936	Total assigned	144	0.576	Total assigned	191	0.764	Total assigned	131	0.524
			Incorrect	7	0.0299145	Incorrect	0	0	Incorrect	77	0.403141	Incorrect	22	0.167939
			Correct	227	0.970085	Correct	144	1	Correct	114	0.596859	Correct	109	0.832061
			Correct to above family	66	0.282051	Correct to above family	65	0.451389	Correct to above family	79	0.413613	Correct to above family	65	0.496183
			Correct to family or below	161	0.688034	Correct to family or below	79	0.548611	Correct to family or below	35	0.183246	Correct to family or below	44	0.335878
